# Supplementary material for: Structure-Based Analysis Reveals Cancer Missense Mutations Target Protein Interaction Interfaces
Source: PLoS One. 2016 Apr 4;11(4):e0152929. doi: 10.1371/journal.pone.0152929 (PMC4820104; doi:10.1371/journal.pone.0152929)
Supplement: S3 File — (XLSX) [file pone.0152929.s005.xlsx]

## Sheet: muts_effects_per_pdb
Cancer Gene Entrez Gene ID	Missense Mutation	PDB ID	FoldX Energy Change	Effect
1029	A76V	1bi7	-0.6818	stabilizing
1029	D74A	1bi7	2.20543	destabilizing
1029	D74E	1bi7	0.7168	destabilizing
1029	D74N	1bi7	1.6252	destabilizing
1029	D74V	1bi7	1.7708	destabilizing
1029	D74Y	1bi7	3.43602	destabilizing
1029	D84H	1bi7	6.83659	destabilizing
1029	D84N	1bi7	0.5567	destabilizing
1029	D84Y	1bi7	1.0225	destabilizing
1029	G89S	1bi7	2.27887	destabilizing
1029	G89V	1bi7	8.17304	destabilizing
1029	M53I	1bi7	1.0211	destabilizing
1029	M53T	1bi7	1.6121	destabilizing
1029	N42D	1bi7	1.4731	destabilizing
1029	N42H	1bi7	0.6809	destabilizing
1029	N42T	1bi7	0.6231	destabilizing
1029	N42Y	1bi7	3.86601	destabilizing
1029	R22P	1bi7	1.2883	destabilizing
1029	R24P	1bi7	-1.0997	stabilizing
1029	R24Q	1bi7	-0.5786	stabilizing
1029	R58Q	1bi7	1.5512	destabilizing
1029	R87W	1bi7	-1.1502	stabilizing
1029	S56N	1bi7	1.2658	destabilizing
1029	T18M	1bi7	-2.4897	stabilizing
1029	T77S	1bi7	1.6326	destabilizing
1029	V51D	1bi7	1.0971	destabilizing
1029	V51F	1bi7	11.4599	destabilizing
1029	W110C	1bi7	1.319	destabilizing
1029	Y44C	1bi7	1.3088	destabilizing
1029	Y44S	1bi7	1.9021	destabilizing
1031	D67N	1g3n	2.2214	destabilizing
1031	R15W	1g3n	-0.6809	stabilizing
1031	R39T	1g3n	-1.1036	stabilizing
1387	D1143H	3svh	-1.58503	stabilizing
1387	I1122T	1jsp	0.986144	destabilizing
1387	P1123L	1jsp	-0.551419	stabilizing
1387	R1091C	3p1e	0.65892	destabilizing
1387	R1140Q	3dwy	-1.0685	stabilizing
1387	R1140Q	3p1c	-0.96147	stabilizing
1387	R1140Q	3p1d	-1.39637	stabilizing
1387	R1140Q	3p1e	-1.20026	stabilizing
1387	R1140Q	4a9k	-0.87528	stabilizing
1387	R1169H	1jsp	-0.533325	stabilizing
1387	R625C	2lxs	1.1013	destabilizing
1387	R672C	2kwf	1.3871	destabilizing
1387	R672C	2lxt	1.1576	destabilizing
1387	R672H	2kwf	1.294	destabilizing
1387	R672H	2lxt	1.1539	destabilizing
1387	T1171I	3p1f	-1.6706	stabilizing
1387	T615I	2kwf	0.7956	destabilizing
1387	Y1102C	3svh	0.92186	destabilizing
1436	R142C	4dkd	0.6965	destabilizing
1436	R192W	4dkd	-1.1306	stabilizing
1436	S250F	4dkd	1.2072	destabilizing
1499	A295D	1th1	1.4508	destabilizing
1499	C429G	1jdh	0.9439	destabilizing
1499	C429G	1jpw	0.8664	destabilizing
1499	C429G	1t08	1.3983	destabilizing
1499	C429G	1th1	0.7357	destabilizing
1499	C429G	2gl7	1.1603	destabilizing
1499	C429Y	1jdh	-0.6446	stabilizing
1499	C429Y	1jpw	4.1394	destabilizing
1499	C429Y	1luj	7.08938	destabilizing
1499	C429Y	1th1	-1.126	stabilizing
1499	C429Y	2gl7	-1.0062	stabilizing
1499	C619Y	1luj	3.6894	destabilizing
1499	C619Y	1t08	3.7799	destabilizing
1499	C619Y	1th1	1.9904	destabilizing
1499	D162E	2gl7	-0.5621	stabilizing
1499	D162E	3sl9	0.5939	destabilizing
1499	D32Y	1p22	7.50302	destabilizing
1499	D390E	1jdh	-0.6593	stabilizing
1499	D390E	1jpw	-1.1014	stabilizing
1499	D390E	1luj	-0.7678	stabilizing
1499	D390E	1t08	-0.6412	stabilizing
1499	D390E	1th1	-0.6848	stabilizing
1499	G34E	1p22	4.30045	destabilizing
1499	G34I	1p22	2.38312	destabilizing
1499	G34R	1p22	4.88638	destabilizing
1499	G34V	1p22	1.9933	destabilizing
1499	H36P	1p22	2.69243	destabilizing
1499	H36R	1p22	0.74323	destabilizing
1499	H36Y	1p22	-1.00762	stabilizing
1499	I35M	1p22	-1.30915	stabilizing
1499	I35N	1p22	1.50015	destabilizing
1499	I35S	1p22	2.06885	destabilizing
1499	I35T	1p22	1.39993	destabilizing
1499	K292E	1jdh	1.4293	destabilizing
1499	K292E	1jpw	1.0411	destabilizing
1499	K292E	1th1	1.165	destabilizing
1499	K292E	2gl7	1.6459	destabilizing
1499	K292T	1jdh	1.2047	destabilizing
1499	K292T	1jpw	1.0036	destabilizing
1499	K292T	1th1	0.7629	destabilizing
1499	K292T	2gl7	1.5174	destabilizing
1499	K292T	3sla	0.5029	destabilizing
1499	K335I	1jdh	0.5676	destabilizing
1499	K335I	1jpw	-0.6922	stabilizing
1499	K335I	2gl7	-1.299	stabilizing
1499	K335T	1jdh	0.9197	destabilizing
1499	K335T	1th1	0.8194	destabilizing
1499	L159P	2gl7	2.3333	destabilizing
1499	L159P	3sl9	2.5501	destabilizing
1499	L31P	1p22	-0.90196	stabilizing
1499	L31W	1p22	-1.55385	stabilizing
1499	N387I	1jpw	1.1839	destabilizing
1499	N387I	1t08	1.8234	destabilizing
1499	N387I	1th1	1.6555	destabilizing
1499	N387K	1jpw	4.1401	destabilizing
1499	N387K	1t08	1.0604	destabilizing
1499	N387K	1th1	0.7218	destabilizing
1499	N387K	2gl7	2.7966	destabilizing
1499	N387Y	1jpw	8.9165	destabilizing
1499	N387Y	1luj	2.0494	destabilizing
1499	N387Y	1t08	6.6275	destabilizing
1499	N387Y	1th1	7.5358	destabilizing
1499	N387Y	2gl7	6.5438	destabilizing
1499	N415H	3tx7	0.9452	destabilizing
1499	N426D	1jdh	2.6413	destabilizing
1499	N426D	1jpw	1.2885	destabilizing
1499	N426D	1t08	1.8471	destabilizing
1499	N426D	1th1	2.2219	destabilizing
1499	N426D	2gl7	2.2972	destabilizing
1499	Q177H	2gl7	0.6818	destabilizing
1499	Q177P	2gl7	0.888	destabilizing
1499	Q302H	1jdh	0.7757	destabilizing
1499	R185G	1th1	0.8827	destabilizing
1499	R225C	1th1	0.827	destabilizing
1499	R342K	1jdh	0.6732	destabilizing
1499	R376H	1jdh	1.6883	destabilizing
1499	R376H	1th1	1.0224	destabilizing
1499	R449C	1g3j	1.14794	destabilizing
1499	R449H	1g3j	1.68485	destabilizing
1499	R453Q	1g3j	0.89438	destabilizing
1499	R469H	1jdh	4.4714	destabilizing
1499	R469H	1luj	0.7816	destabilizing
1499	R469H	1t08	-0.6556	stabilizing
1499	R469H	1th1	-1.2747	stabilizing
1499	R469H	2gl7	1.0739	destabilizing
1499	R515Q	1luj	-1.7712	stabilizing
1499	R582Q	1luj	2.2367	destabilizing
1499	R661L	1luj	3.887	destabilizing
1499	R661L	1t08	0.972	destabilizing
1499	S425C	1th1	-0.5296	stabilizing
1499	T257I	1jdh	-1.1824	stabilizing
1499	T257I	1jpw	-1.1503	stabilizing
1499	T653R	1luj	2.2507	destabilizing
1499	T653R	1th1	-0.604	stabilizing
1499	V166G	3sl9	1.0612	destabilizing
1499	W383C	1t08	1.3707	destabilizing
1499	W383C	1th1	0.7871	destabilizing
1499	W383C	3tx7	3.07096	destabilizing
1499	W383G	1t08	2.142	destabilizing
1499	W383G	1th1	1.0065	destabilizing
1499	W383G	3tx7	3.14418	destabilizing
1499	W383R	1t08	1.8759	destabilizing
1499	W383R	1th1	0.6664	destabilizing
1499	W383R	3tx7	1.783	destabilizing
1540	S615Y	2vhf	2.8416	destabilizing
1616	D331Y	4h9n	1.4972	destabilizing
1616	D331Y	4h9o	0.9222	destabilizing
1616	D331Y	4h9p	1.2666	destabilizing
1616	D331Y	4h9q	1.5675	destabilizing
1616	D331Y	4h9r	1.9733	destabilizing
1616	D738H	2kqs	-1.28107	stabilizing
1616	G250D	4h9n	-0.6862	stabilizing
1616	G250D	4h9o	-0.8094	stabilizing
1616	G250D	4h9p	0.7477	destabilizing
1616	G250D	4h9q	-0.6087	stabilizing
1616	G250D	4h9r	-0.8547	stabilizing
1616	P280S	4h9n	-0.542	stabilizing
1616	P280S	4h9r	0.564	destabilizing
1616	R203Q	4h9q	0.6655	destabilizing
1616	R263H	4h9s	0.919242	destabilizing
1616	R328C	4h9n	1.311	destabilizing
1616	R328C	4h9n	1.1115	destabilizing
1616	R328C	4h9o	1.0913	destabilizing
1616	R328C	4h9o	1.5433	destabilizing
1616	R328C	4h9p	1.4471	destabilizing
1616	R328C	4h9q	1.0636	destabilizing
1616	R328C	4h9q	1.3773	destabilizing
1616	R328C	4h9r	1.6394	destabilizing
1616	R328C	4h9r	1.4023	destabilizing
1616	R328C	4hga	1.619	destabilizing
1616	R371W	4h9r	1.8205	destabilizing
1616	R371W	4hga	-0.8242	stabilizing
1788	F772I	2qrv	0.7244	destabilizing
1788	R688S	2qrv	0.5228	destabilizing
1788	R729Q	2qrv	-0.7623	stabilizing
1788	R729W	2qrv	1.4625	destabilizing
1788	R736A	2qrv	2.1477	destabilizing
1788	R736C	2qrv	1.6853	destabilizing
1788	R736H	2qrv	0.9129	destabilizing
1788	R771L	2qrv	-2.8593	stabilizing
1788	R771Q	2qrv	-2.0113	stabilizing
1788	Y724C	2qrv	0.9216	destabilizing
1956	A702S	3ika	0.5945	destabilizing
1956	A702S	4g5p	0.5056	destabilizing
1956	A702T	3gt8	0.677	destabilizing
1956	A702T	3ika	0.7338	destabilizing
1956	A767V	3ika	0.7122	destabilizing
1956	D46N	1nql	-0.5141	stabilizing
1956	D800N	2gs7	-0.743	stabilizing
1956	E114K	3njp	-0.6324	stabilizing
1956	E709G	4g5p	0.5269	destabilizing
1956	E709K	3ika	-0.7074	stabilizing
1956	E709K	4ll0	-0.8636	stabilizing
1956	E709V	3ika	-0.6819	stabilizing
1956	E709V	4ll0	-0.6444	stabilizing
1956	E736G	3gt8	1.3089	destabilizing
1956	E736G	4i24	1.3672	destabilizing
1956	E804G	2gs7	0.9619	destabilizing
1956	E804G	3lzb	0.61468	destabilizing
1956	E804K	3lzb	-0.52871	stabilizing
1956	F795S	2gs7	4.676	destabilizing
1956	F795S	2jiv	2.3756	destabilizing
1956	F795S	3gt8	2.1912	destabilizing
1956	F795S	4i24	2.6394	destabilizing
1956	G652W	2ks1	0.59482	destabilizing
1956	G652W	2m20	6.88808	destabilizing
1956	G719V	3lzb	0.63051	destabilizing
1956	G779C	3gt8	0.5645	destabilizing
1956	G779D	3gt8	2.1515	destabilizing
1956	G779F	3gt8	2.1907	destabilizing
1956	G779S	3gt8	0.8141	destabilizing
1956	G779V	3gt8	6.2716	destabilizing
1956	G796A	2gs7	0.8269	destabilizing
1956	G796D	2gs7	0.796	destabilizing
1956	G796S	2gs7	1.0582	destabilizing
1956	G796V	2gs7	0.6454	destabilizing
1956	H805I	2jiv	0.5482	destabilizing
1956	H805L	4i24	0.6016	destabilizing
1956	H805R	2jiv	-0.9158	stabilizing
1956	H805Y	2jiv	0.5956	destabilizing
1956	H805Y	3gt8	1.8462	destabilizing
1956	H850D	2jiv	1.7964	destabilizing
1956	H850N	2jiv	0.6164	destabilizing
1956	H850Y	2jiv	2.649	destabilizing
1956	I706T	3ika	0.7909	destabilizing
1956	I706T	4g5p	2.041	destabilizing
1956	I706T	4ll0	0.8888	destabilizing
1956	I715L	2gs7	-0.6883	stabilizing
1956	I715S	2gs7	4.8431	destabilizing
1956	I740T	2jiv	1.4475	destabilizing
1956	I740T	3gt8	1.0055	destabilizing
1956	I740T	4i24	2.0279	destabilizing
1956	K708E	3ika	0.9745	destabilizing
1956	K708E	4g5p	1.6697	destabilizing
1956	K708E	4ll0	1.2855	destabilizing
1956	K708M	3ika	-1.6629	stabilizing
1956	K708M	4g5p	-0.914	stabilizing
1956	K708M	4ll0	-1.5981	stabilizing
1956	K708N	3ika	-1.6614	stabilizing
1956	K708N	4g5p	2.0778	destabilizing
1956	K708N	4ll0	1.0244	destabilizing
1956	K708R	3ika	-0.8678	stabilizing
1956	K708R	4g5p	0.5327	destabilizing
1956	K716R	2gs7	1.1652	destabilizing
1956	L38V	1ivo	0.7256	destabilizing
1956	L38V	1mox	0.5179	destabilizing
1956	L703F	3ika	-0.8055	stabilizing
1956	L703F	4ll0	-0.8077	stabilizing
1956	L703P	2jiv	1.8236	destabilizing
1956	L703V	2jiv	1.092	destabilizing
1956	L707F	3gt8	7.2925	destabilizing
1956	L707F	4i24	6.1497	destabilizing
1956	L707S	3gt8	0.6316	destabilizing
1956	L707S	4i24	1.1396	destabilizing
1956	L730F	2gs7	4.5291	destabilizing
1956	L782P	3ika	0.7743	destabilizing
1956	L782P	4g5p	1.7967	destabilizing
1956	L782P	4ll0	4.2428	destabilizing
1956	N700D	4g5p	1.7797	destabilizing
1956	N700D	4ll0	0.5728	destabilizing
1956	N700S	4g5p	0.7351	destabilizing
1956	N700Y	4g5p	2.2323	destabilizing
1956	N756S	4g5p	1.9432	destabilizing
1956	N756Y	3ika	-1.3628	stabilizing
1956	N756Y	4g5p	2.1534	destabilizing
1956	N756Y	4ll0	-1.0765	stabilizing
1956	P699H	4g5p	3.0237	destabilizing
1956	P699H	4ll0	0.8211	destabilizing
1956	P699L	4g5p	1.0286	destabilizing
1956	P699S	3ika	1.0792	destabilizing
1956	P699S	4g5p	1.084	destabilizing
1956	P699S	4ll0	1.1748	destabilizing
1956	P733L	2jiv	-0.9942	stabilizing
1956	P733L	3gt8	0.556	destabilizing
1956	P733L	4i24	1.862	destabilizing
1956	P733S	2jiv	-1.4913	stabilizing
1956	P733T	2jiv	-1.9203	stabilizing
1956	P733T	4i24	1.2053	destabilizing
1956	P753F	4ll0	-0.6101	stabilizing
1956	P753S	3ika	0.5169	destabilizing
1956	P794H	2gs7	-0.645	stabilizing
1956	P848R	2gs7	1.4122	destabilizing
1956	P934S	2rf9	1.6157	destabilizing
1956	P934S	2rfd	1.8026	destabilizing
1956	P934S	2rfe	1.3942	destabilizing
1956	P934S	4i21	1.6949	destabilizing
1956	Q432H	1ivo	1.1346	destabilizing
1956	Q432H	1mox	1.2896	destabilizing
1956	Q432H	3njp	-1.2327	stabilizing
1956	R705G	3gt8	1.1471	destabilizing
1956	R705G	4i24	1.3789	destabilizing
1956	R705K	2jiv	-2.9701	stabilizing
1956	R705K	3gt8	-0.5051	stabilizing
1956	R776H	2jiv	-0.7537	stabilizing
1956	S492R	3njp	0.7517	destabilizing
1956	S720F	3lzb	-0.552	stabilizing
1956	S720P	3lzb	1.4914	destabilizing
1956	S720T	3lzb	-0.81965	stabilizing
1956	S720Y	3lzb	-0.96108	stabilizing
1956	S784F	4ll0	-1.7453	stabilizing
1956	S784P	4ll0	-0.5335	stabilizing
1956	S784Y	4ll0	-1.5452	stabilizing
1956	T710A	4g5p	0.7361	destabilizing
1956	T783I	3ika	-0.5478	stabilizing
1956	T847A	2gs7	0.6032	destabilizing
1956	T847A	2jiv	-0.6041	stabilizing
1956	T847I	2jiv	-2.6189	stabilizing
1956	V717A	3lzb	1.4194	destabilizing
1956	V738G	2jiv	1.2727	destabilizing
1956	V738G	3gt8	2.1153	destabilizing
1956	V738G	4i24	2.3768	destabilizing
1956	V742A	4i24	0.712	destabilizing
1956	W731L	3gt8	1.5908	destabilizing
1956	W731L	4i24	1.7095	destabilizing
1956	W731R	3gt8	2.7025	destabilizing
1956	W731R	4i24	3.3192	destabilizing
1956	Y125C	1mox	0.8114	destabilizing
1956	Y764H	3ika	1.471	destabilizing
1956	Y764H	4g5p	1.3385	destabilizing
1956	Y764H	4ll0	1.506	destabilizing
1956	Y764S	3ika	2.812	destabilizing
1956	Y764S	4g5p	3.2458	destabilizing
1956	Y764S	4ll0	2.981	destabilizing
1956	Y801C	2gs7	0.5154	destabilizing
1956	Y801C	3gt8	1.0895	destabilizing
1956	Y801C	4i24	1.3524	destabilizing
1956	Y801H	3gt8	0.5665	destabilizing
1956	Y801H	4i24	0.5804	destabilizing
2033	C1779G	2k8f	1.30165	destabilizing
2033	K1774N	2k8f	-0.75222	stabilizing
2033	R397Q	1l3e	-1.6497	stabilizing
2033	S1730F	2k8f	-0.99736	stabilizing
2033	T380A	1l3e	0.7501	destabilizing
2064	L663P	2ks1	1.29085	destabilizing
2064	P122L	3h3b	-0.792	stabilizing
2064	R157W	3h3b	0.73741	destabilizing
2064	S656F	2jwa	7.58043	destabilizing
2064	S656F	2ks1	-0.77287	stabilizing
207	G311D	3cqu	0.676	destabilizing
207	G311D	3cqw	1.3057	destabilizing
207	G311D	4ekk	0.7147	destabilizing
2261	E322K	1ry7	1.3103	destabilizing
2263	A315T	1ev2	0.7245	destabilizing
2263	A315T	1ii4	1.2496	destabilizing
2263	D247H	1ev2	-0.5376	stabilizing
2263	D247H	1ii4	-0.6982	stabilizing
2263	D247H	1iil	-0.7265	stabilizing
2263	D247H	2fdb	-1.0085	stabilizing
2263	D247H	3ojm	0.5586	destabilizing
2263	D247N	2fdb	-0.5474	stabilizing
2263	D247N	3ojm	0.9008	destabilizing
2263	D283N	1djs	-0.7388	stabilizing
2263	E163K	1iil	-0.596	stabilizing
2263	E596K	4j97	-0.5021	stabilizing
2263	E718K	3b2t	-0.6983	stabilizing
2263	G583R	4j97	-0.5064	stabilizing
2263	L560F	2psq	-0.6199	stabilizing
2263	L560F	2pvy	-1.14	stabilizing
2263	L560F	3b2t	-0.8128	stabilizing
2263	L560F	4j96	-0.795	stabilizing
2263	L560F	4j98	-0.7203	stabilizing
2263	L560F	4j99	-0.6749	stabilizing
2263	P253L	1ev2	-0.556	stabilizing
2263	P253L	1ev2	1.1051	destabilizing
2263	P253L	1ii4	-0.7995	stabilizing
2263	P253L	1ii4	0.96357	destabilizing
2263	P253L	1nun	-1.3258	stabilizing
2263	P253R	1ev2	-0.797	stabilizing
2263	P253R	1ii4	-1.3406	stabilizing
2263	P253R	1ii4	1.06016	destabilizing
2263	P253R	1nun	-1.1597	stabilizing
2263	P253R	3oj2	0.8178	destabilizing
2263	P253S	1ev2	0.7603	destabilizing
2263	P253S	1ev2	1.26514	destabilizing
2263	P253S	1ii4	0.5736	destabilizing
2263	P253S	1ii4	1.16495	destabilizing
2263	P253S	1nun	0.5243	destabilizing
2263	P253S	3oj2	1.5391	destabilizing
2263	P666S	4j99	0.5693	destabilizing
2263	P708S	2psq	1.4353	destabilizing
2263	P708S	2pvy	0.7463	destabilizing
2263	P708S	3b2t	1.6215	destabilizing
2263	P708S	3ri1	0.7325	destabilizing
2263	P708S	4j95	1.7803	destabilizing
2263	P708S	4j96	0.9652	destabilizing
2263	P708S	4j98	0.7926	destabilizing
2263	P708S	4j99	1.116	destabilizing
2263	R165W	3oj2	-0.9416	stabilizing
2263	R165W	3ojm	-1.1802	stabilizing
2263	R251L	1djs	1.3672	destabilizing
2263	R251L	1ev2	0.8494	destabilizing
2263	R251L	1ii4	1.4248	destabilizing
2263	R251L	1iil	1.8529	destabilizing
2263	R251L	3oj2	0.6429	destabilizing
2263	R251L	3ojm	1.0251	destabilizing
2263	R251Q	1djs	3.3465	destabilizing
2263	R251Q	1ev2	1.8566	destabilizing
2263	R251Q	1ii4	2.6279	destabilizing
2263	R251Q	1iil	2.4444	destabilizing
2263	R251Q	1nun	0.6441	destabilizing
2263	R251Q	2fdb	1.3141	destabilizing
2263	R251Q	3oj2	2.2589	destabilizing
2263	R251Q	3ojm	1.727	destabilizing
2263	R573W	3b2t	0.6937	destabilizing
2263	R664W	2psq	-1.413	stabilizing
2263	R664W	2pvy	-1.1208	stabilizing
2263	R664W	3b2t	-1.869	stabilizing
2263	R664W	3ri1	-1.5838	stabilizing
2263	R664W	4j95	-1.0518	stabilizing
2263	R664W	4j96	-0.6606	stabilizing
2263	R664W	4j98	-1.9923	stabilizing
2263	R664W	4j99	-1.3653	stabilizing
2263	R678G	4j96	0.7489	destabilizing
2263	S252W	1iil	-0.6777	stabilizing
2263	S252W	1nun	-1.5331	stabilizing
2263	V280I	3ojm	0.5457	destabilizing
2263	Y237H	3dar	-0.63293	stabilizing
23152	S39C	4j2j	-1.5483	stabilizing
23152	S39C	4j2l	-0.9673	stabilizing
23152	W37R	4j2j	4.634	destabilizing
23152	W37R	4j2l	2.6378	destabilizing
23152	W37S	4j2j	5.245	destabilizing
23152	W37S	4j2l	3.1551	destabilizing
23451	M407V	2f9j	2.0355	destabilizing
23451	M407V	3lqv	3.1554	destabilizing
25	A397P	2hzi	2.38255	destabilizing
25	D444Y	2e2b	-1.3101	stabilizing
25	D444Y	2gqg	-1.4346	stabilizing
25	E279G	2hzi	0.87171	destabilizing
25	E279K	2g2h	-1.3282	stabilizing
25	E279Y	2hzi	-1.04549	stabilizing
25	E282K	2g2h	-0.9706	stabilizing
25	E373G	2g2i	-1.2669	stabilizing
25	E373G	3pyy	1.4984	destabilizing
25	E459K	2e2b	-0.7697	stabilizing
25	E459K	2gqg	-0.686	stabilizing
25	E494G	3pyy	-0.5977	stabilizing
25	F317I	3pyy	1.5309	destabilizing
25	G372V	3pyy	6.2489	destabilizing
25	H246Y	2g1t	-1.21938	stabilizing
25	H396P	2hz4	0.65944	destabilizing
25	H396R	2hyy	-1.69731	stabilizing
25	H396R	2hz4	0.69352	destabilizing
25	H396R	2hzi	0.6745	destabilizing
25	I360S	3qri	0.610495	destabilizing
25	L387F	2g2h	2.0568	destabilizing
25	L387M	2g2h	0.9491	destabilizing
25	N374S	2g2i	-0.7576	stabilizing
25	N374S	3pyy	1.4144	destabilizing
25	N374Y	2g2i	4.3292	destabilizing
25	S265R	3pyy	-1.2893	stabilizing
25	T389A	2hz4	1.71739	destabilizing
25	T389A	3ue4	0.50721	destabilizing
25	V338F	2g2i	3.5452	destabilizing
25	Y320C	3pyy	2.3245	destabilizing
25	Y449C	2hyy	0.74857	destabilizing
2625	T315M	4hc7	-0.533236	stabilizing
2956	A1303T	2o8b	1.0728	destabilizing
2956	A1303T	2o8e	0.6972	destabilizing
2956	A1303T	2o8f	0.7915	destabilizing
2956	G1299D	2o8b	5.036	destabilizing
2956	G1299D	2o8c	5.1283	destabilizing
2956	G1299D	2o8e	4.6786	destabilizing
2956	G1299D	2o8f	6.79	destabilizing
2956	I1227T	2o8b	1.5464	destabilizing
2956	I1227T	2o8c	2.0057	destabilizing
2956	I1227T	2o8e	1.4361	destabilizing
2956	I1227T	2o8f	1.3856	destabilizing
2956	R577H	2o8b	1.1951	destabilizing
2956	R577H	2o8c	1.9991	destabilizing
2956	R577H	2o8e	0.5719	destabilizing
2956	S532A	2o8f	-0.7779	stabilizing
2956	T1189I	2o8e	-0.6668	stabilizing
2956	T1219I	2o8c	-0.7512	stabilizing
2956	T1219I	2o8e	1.8381	destabilizing
3020	A48E	3av2	2.0154	destabilizing
3020	A48E	3av2	0.6307	destabilizing
3020	A99T	4hga	1.2256	destabilizing
3020	I90V	4hga	0.5175	destabilizing
3020	K5M	3qlc	-0.82756	stabilizing
3020	K5M	4gnf	-1.5238	stabilizing
3020	Q56H	3av2	7.4757	destabilizing
3020	Q56H	3av2	1.2729	destabilizing
3020	Q56H	4h9o	0.5084	destabilizing
3020	Q56H	4hga	1.2958	destabilizing
3020	R129H	3av2	1.4236	destabilizing
3020	R3C	4gnf	0.95721	destabilizing
3020	R3C	4gur	0.5066	destabilizing
3020	R3C	4gus	0.6254	destabilizing
3020	R50C	4hga	1.5435	destabilizing
3020	R9G	4gu0	1.9017	destabilizing
3020	R9G	4gur	2.0969	destabilizing
3020	R9G	4gus	3.4802	destabilizing
3020	R9H	4gnf	-0.7343	stabilizing
3020	R9H	4gu0	0.7542	destabilizing
3020	R9H	4gur	0.6519	destabilizing
3020	R9H	4gus	3.4496	destabilizing
3020	T46A	4h9n	0.5352	destabilizing
3020	T46A	4h9o	0.6422	destabilizing
3020	T46A	4h9p	0.5741	destabilizing
3020	T46A	4h9q	0.6909	destabilizing
3020	T46A	4h9r	0.52	destabilizing
324	A2046T	1emu	2.6662	destabilizing
324	D1519N	1th1	1.0748	destabilizing
324	E1494K	1th1	-0.5416	stabilizing
324	E1513G	1th1	2.7543	destabilizing
324	E418Q	3nmw	-0.51936	stabilizing
324	F1491L	1t08	0.76	destabilizing
324	F1491L	1th1	1.3128	destabilizing
324	F1491S	1t08	1.9164	destabilizing
324	F1491S	1th1	0.8288	destabilizing
324	G470V	3nmw	0.67717	destabilizing
324	H1490Y	1t08	0.6355	destabilizing
324	H1490Y	1th1	0.5976	destabilizing
324	L1488F	1th1	-0.5809	stabilizing
324	L1489F	1th1	1.0493	destabilizing
324	L1489V	1t08	1.3899	destabilizing
324	L1489V	1th1	1.6787	destabilizing
324	L407F	3nmw	0.57218	destabilizing
324	M1583V	2rqu	0.60253	destabilizing
324	M2047V	1emu	1.5383	destabilizing
324	M44V	1deb	0.8263	destabilizing
324	N1473T	1th1	-1.3766	stabilizing
324	N550H	3nmx	7.3572	destabilizing
324	N550H	3nmz	7.7207	destabilizing
324	N550H	3qhe	12.7092	destabilizing
324	P1527L	1th1	-1.1159	stabilizing
324	Q1477R	1th1	1.5052	destabilizing
324	Q1480R	1th1	-0.7719	stabilizing
324	R1589H	2rqu	4.24496	destabilizing
324	R640W	3qhe	3.1499	destabilizing
324	S546G	3nmx	1.389	destabilizing
324	S546G	3nmz	1.3853	destabilizing
324	W421C	3nmw	0.51688	destabilizing
324	W593L	3nmz	0.5194	destabilizing
324	W685R	3t7u	1.19628	destabilizing
3265	E143K	3k9l	0.7702	destabilizing
3265	E143K	3lo5	0.80438	destabilizing
3265	E62G	1wq1	1.1719	destabilizing
3265	G12A	1lfd	-0.56118	stabilizing
3265	G12A	1wq1	1.228	destabilizing
3265	G12C	1lfd	-0.89836	stabilizing
3265	G12C	1wq1	2.253	destabilizing
3265	G12D	1lfd	0.77794	destabilizing
3265	G12D	1wq1	2.2481	destabilizing
3265	G12R	1lfd	-1.6247	stabilizing
3265	G12R	1wq1	5.99435	destabilizing
3265	G12S	1wq1	3.57812	destabilizing
3265	G12T	1lfd	0.964	destabilizing
3265	G12T	1wq1	4.20438	destabilizing
3265	G12V	1lfd	-1.05334	stabilizing
3265	G12V	1wq1	3.6976	destabilizing
3265	G13C	1lfd	1.20859	destabilizing
3265	G13C	1wq1	1.5685	destabilizing
3265	G13D	1bkd	0.9704	destabilizing
3265	G13D	1lfd	1.54247	destabilizing
3265	G13D	1wq1	3.63087	destabilizing
3265	G13I	1lfd	1.64234	destabilizing
3265	G13I	1wq1	5.6743	destabilizing
3265	G13R	1lfd	1.15839	destabilizing
3265	G13R	1wq1	2.4515	destabilizing
3265	G13S	1lfd	1.55566	destabilizing
3265	G13S	1wq1	2.2326	destabilizing
3265	G13V	1lfd	1.75999	destabilizing
3265	G13V	1wq1	3.37609	destabilizing
3265	G48R	1iaq	2.41422	destabilizing
3265	G48R	3k9l	2.17588	destabilizing
3265	G48R	3k9l	0.57955	destabilizing
3265	G48R	3lo5	1.08513	destabilizing
3265	G48R	6q21	0.525542	destabilizing
3265	G60S	1bkd	5.7645	destabilizing
3265	Q25L	1he8	-1.12923	stabilizing
3265	Q25L	1wq1	-0.6422	stabilizing
3265	Q25L	4g0n	-1.4379	stabilizing
3265	Q25L	4g3x	-0.53421	stabilizing
3265	Q61E	1bkd	1.3587	destabilizing
3265	Q61E	1nvv	0.8142	destabilizing
3265	Q61E	1wq1	-1.1412	stabilizing
3265	Q61H	1bkd	2.2718	destabilizing
3265	Q61H	1lfd	1.00522	destabilizing
3265	Q61H	1wq1	-1.2323	stabilizing
3265	Q61H	1xd2	-1.1443	stabilizing
3265	Q61K	1lfd	-0.74906	stabilizing
3265	Q61K	1nvv	0.8971	destabilizing
3265	Q61L	1bkd	1.1889	destabilizing
3265	Q61L	1lfd	-1.63208	stabilizing
3265	Q61L	1nvw	-1.0494	stabilizing
3265	Q61L	1wq1	-1.8671	stabilizing
3265	Q61L	1xd2	-1.1896	stabilizing
3265	Q61P	1bkd	4.0147	destabilizing
3265	Q61R	1lfd	-1.31372	stabilizing
3265	Q61R	1nvv	1.0649	destabilizing
3265	Q61R	1wq1	1.3587	destabilizing
3265	R128L	3k9l	0.6387	destabilizing
3265	R135Q	3k9l	0.67	destabilizing
3417	A179D	1t0l	1.975	destabilizing
3417	A179D	3inm	3.465	destabilizing
3417	A179D	4i3k	2.8435	destabilizing
3417	A179D	4i3l	4.7451	destabilizing
3417	A179D	4kzo	2.17	destabilizing
3417	A179D	4l03	2.071	destabilizing
3417	A179D	4l04	3.198	destabilizing
3417	A179D	4l06	3.452	destabilizing
3417	A256S	1t0l	0.635	destabilizing
3417	A256S	3inm	0.642	destabilizing
3417	A256S	4l03	0.568	destabilizing
3417	A256S	4l04	0.61	destabilizing
3417	A256S	4l06	0.579	destabilizing
3417	M182L	4i3k	0.8879	destabilizing
3417	M182L	4l06	-0.535	stabilizing
3417	Q185P	1t0l	0.761	destabilizing
3417	Q185P	3inm	1.946	destabilizing
3417	Q185P	4i3k	-0.7497	stabilizing
3417	Q185P	4l03	0.952	destabilizing
3417	V178I	4i3k	-0.8907	stabilizing
3417	V178I	4i3l	-0.6234	stabilizing
3417	V178I	4l04	0.613	destabilizing
3418	R188W	4ja8	1.3507	destabilizing
3418	V217L	4ja8	2.0951	destabilizing
3716	A634D	4l00	4.8355	destabilizing
3716	A634D	4l01	2.8225	destabilizing
3716	E637K	4l00	2.2142	destabilizing
3716	T1102K	4e4l	1.2352	destabilizing
3716	T1102K	4e5w	2.9168	destabilizing
3716	T1102K	4ehz	-0.705	stabilizing
3716	T1102K	4ei4	0.596	destabilizing
3716	V1045K	4e4n	-0.745	stabilizing
3717	E1006Q	4ji9	0.73314	destabilizing
3717	P933R	4bbe	-0.9394	stabilizing
3717	P933R	4bbf	0.8971	destabilizing
3717	P933R	4e4m	-0.5757	stabilizing
3717	T875N	4e6q	-2.11554	stabilizing
3717	Y931C	4bbe	0.6643	destabilizing
3717	Y931C	4bbf	1.08267	destabilizing
3717	Y931C	4e4m	1.88582	destabilizing
3718	S942F	3zc6	-0.9583	stabilizing
3815	F848L	3g0f	0.822	destabilizing
3815	G812V	3g0f	8.3666	destabilizing
3815	I571M	3g0f	-0.7978	stabilizing
3815	I571R	3g0f	1.809	destabilizing
3815	I789T	3g0f	1.8243	destabilizing
3815	I841V	1pkg	-0.5354	stabilizing
3815	L576F	3g0f	-0.6648	stabilizing
3815	L576P	3g0f	0.8839	destabilizing
3815	L647P	3g0f	0.6372	destabilizing
3815	L831P	1pkg	1.4983	destabilizing
3815	N566D	3g0f	0.6449	destabilizing
3815	N566S	3g0f	0.5541	destabilizing
3815	N566Y	3g0f	1.0001	destabilizing
3815	N567H	3g0f	-1.8585	stabilizing
3815	N567K	3g0f	-1.3494	stabilizing
3815	N567S	3g0f	-0.5533	stabilizing
3815	P573L	3g0f	1.0657	destabilizing
3815	P577S	3g0f	0.9617	destabilizing
3815	R205S	2e9w	-0.59013	stabilizing
3815	S261R	2e9w	1.48645	destabilizing
3815	V569A	3g0f	2.0863	destabilizing
3815	V569G	3g0f	2.4443	destabilizing
3815	V643A	3g0f	1.0385	destabilizing
3815	Y568C	3g0f	2.5206	destabilizing
3815	Y568D	3g0f	4.4105	destabilizing
3815	Y568S	3g0f	3.5397	destabilizing
3815	Y570D	3g0f	5.0658	destabilizing
3815	Y570H	3g0f	3.2722	destabilizing
4087	D450N	1u7v	-0.9943	stabilizing
4087	L446V	1u7v	1.424	destabilizing
4087	V398A	1dev	0.6304	destabilizing
4087	Y406C	1u7v	1.5624	destabilizing
4089	D355A	1u7v	-0.8018	stabilizing
4089	D355G	1u7f	0.5505	destabilizing
4089	D355G	1u7v	-0.7169	stabilizing
4089	D355N	1u7v	-0.6048	stabilizing
4089	D355V	1u7v	-0.6194	stabilizing
4089	E337G	1u7f	1.9274	destabilizing
4089	E337K	1u7f	1.9527	destabilizing
4089	E337K	1u7v	-1.3289	stabilizing
4089	H382D	1u7f	1.5907	destabilizing
4089	H382D	1u7v	2.5864	destabilizing
4089	H382L	1u7f	-0.9727	stabilizing
4089	K507E	1u7v	1.1355	destabilizing
4089	K507R	1u7v	-1.0061	stabilizing
4089	P356L	1u7f	0.9434	destabilizing
4089	P356L	1u7v	1.1498	destabilizing
4089	P356R	1u7f	1.8079	destabilizing
4089	P356R	1u7v	2.53	destabilizing
4089	P356S	1u7f	1.7384	destabilizing
4089	P356S	1u7v	2.1595	destabilizing
4089	P514S	1u7f	1.4433	destabilizing
4089	P514S	1u7v	1.0988	destabilizing
4089	R380K	1u7f	-1.4009	stabilizing
4089	R380K	1u7v	-1.7093	stabilizing
4089	S357P	1u7v	1.5778	destabilizing
4089	S368C	1u7f	1.1767	destabilizing
4089	V506A	1u7v	0.8417	destabilizing
4089	V506E	1u7f	0.5048	destabilizing
4089	V506E	1u7v	0.6802	destabilizing
4089	V506M	1u7f	0.5147	destabilizing
4089	V506M	1u7v	0.7072	destabilizing
4089	Y353C	1u7f	0.8121	destabilizing
4089	Y353C	1u7v	0.9989	destabilizing
4089	Y353H	1u7f	1.0214	destabilizing
4089	Y353N	1u7f	1.9165	destabilizing
4089	Y353N	1u7v	1.6641	destabilizing
4193	G12R	4hbm	2.97666	destabilizing
4193	R65Q	3iux	1.40022	destabilizing
4193	R65Q	4jwr	-0.5629	stabilizing
4193	V451A	2hdp	1.3894	destabilizing
4193	V451A	2vje	1.0409	destabilizing
4193	V451A	2vjf	0.8841	destabilizing
4193	Y489H	2hdp	0.7172	destabilizing
4193	Y489H	2vje	0.6396	destabilizing
4221	A88T	3u88	1.4077	destabilizing
4221	G99S	3u88	6.1564	destabilizing
4221	L89R	3u88	1.5874	destabilizing
4221	Q96P	3u88	2.0367	destabilizing
4221	S159N	3u85	-1.0431	stabilizing
4233	E221G	1shy	2.9512	destabilizing
4233	E221G	4k3j	2.56843	destabilizing
4233	F1200I	3efk	2.6308	destabilizing
4233	F192L	1shy	1.1708	destabilizing
4233	F192L	4k3j	1.1764	destabilizing
4233	L229F	1shy	-0.5877	stabilizing
4233	L238F	2uzy	0.55947	destabilizing
4233	P712R	2uzy	0.97955	destabilizing
4233	T230M	1shy	-0.9287	stabilizing
4233	T230M	4k3j	-0.8135	stabilizing
4436	A733T	2o8b	1.2002	destabilizing
4436	A733T	2o8e	1.8416	destabilizing
4436	A733T	2o8f	2.8856	destabilizing
4436	A733T	3thx	0.881	destabilizing
4436	A733T	3thz	1.2934	destabilizing
4436	D543N	3thx	0.675	destabilizing
4436	D758N	2o8b	-1.1594	stabilizing
4436	D758N	2o8c	-0.5033	stabilizing
4436	D758N	2o8f	-0.8007	stabilizing
4436	D758N	3thz	-0.7263	stabilizing
4436	F58L	3thw	-0.731	stabilizing
4436	F58L	3thx	-0.584	stabilizing
4436	F58L	3thy	-0.866	stabilizing
4436	F58L	3thz	-0.8768	stabilizing
4436	G827E	2o8b	12.7268	destabilizing
4436	G827E	2o8c	5.587	destabilizing
4436	G827E	2o8e	17.0411	destabilizing
4436	G827E	2o8f	7.5999	destabilizing
4436	G827E	3thw	10.5823	destabilizing
4436	G827E	3thx	13.443	destabilizing
4436	G827E	3thy	12.4291	destabilizing
4436	G827E	3thz	12.1869	destabilizing
4436	G827R	2o8b	13.6551	destabilizing
4436	G827R	2o8c	6.2147	destabilizing
4436	G827R	2o8e	19.5616	destabilizing
4436	G827R	2o8f	8.2567	destabilizing
4436	G827R	3thw	12.3647	destabilizing
4436	G827R	3thx	15.485	destabilizing
4436	G827R	3thy	16.9369	destabilizing
4436	G827R	3thz	7.654	destabilizing
4436	G827W	2o8b	12.1991	destabilizing
4436	G827W	2o8c	11.0036	destabilizing
4436	G827W	2o8e	33.9015	destabilizing
4436	G827W	2o8f	6.2722	destabilizing
4436	G827W	3thw	31.5823	destabilizing
4436	G827W	3thx	27.3859	destabilizing
4436	G827W	3thy	27.9592	destabilizing
4436	G827W	3thz	23.9126	destabilizing
4436	M83I	2o8c	0.717	destabilizing
4436	M83I	3thw	0.58	destabilizing
4436	M83I	3thx	0.599	destabilizing
4436	M83I	3thy	1.688	destabilizing
4436	M83I	3thz	3.9162	destabilizing
4436	S723F	2o8b	-2.2128	stabilizing
4436	S723F	2o8c	-2.4143	stabilizing
4436	S723F	2o8e	-0.9793	stabilizing
4436	S723F	2o8f	5.7076	destabilizing
4436	S723F	3thw	-2.255	stabilizing
4436	S723F	3thx	1.701	destabilizing
4436	S723F	3thz	-2.5876	stabilizing
4609	F374L	1nkp	1.0297	destabilizing
4609	F374L	1nkp	-0.64533	stabilizing
4609	L377S	1nkp	1.9774	destabilizing
4609	P59L	1mv0	0.72074	destabilizing
4609	P59Q	1mv0	1.793	destabilizing
4609	P59S	1mv0	1.27474	destabilizing
4609	Q380H	1nkp	-1.7064	stabilizing
4609	S67F	1mv0	-2.08301	stabilizing
4763	D1837N	2d4q	0.684	destabilizing
4763	D1837N	2e2x	-3.37744	stabilizing
4763	D1837N	3p7z	0.95863	destabilizing
4763	D1837N	3pg7	1.21166	destabilizing
4763	R1830C	2e2x	0.66405	destabilizing
4763	R1830H	2e2x	0.60054	destabilizing
4771	E129G	3u8z	-2.16013	stabilizing
4771	E247G	3u8z	1.41188	destabilizing
4771	P246L	3u8z	-1.35358	stabilizing
4780	E78K	3zgc	1.33612	destabilizing
4780	E78K	3zgc	-0.702155	stabilizing
4780	E79D	3zgc	0.92748	destabilizing
4780	E79G	2flu	1.3221	destabilizing
4780	E79G	3zgc	1.14177	destabilizing
4780	E79Q	2flu	-1.0512	stabilizing
4780	E79Q	3zgc	-0.67138	stabilizing
4780	E79V	2flu	-1.0568	stabilizing
4780	E82A	2flu	1.9447	destabilizing
4780	E82A	3zgc	2.08345	destabilizing
4780	E82D	2flu	2.95104	destabilizing
4780	E82D	3zgc	2.58131	destabilizing
4780	E82G	2flu	2.34039	destabilizing
4780	E82G	3zgc	2.61606	destabilizing
4780	E82V	3zgc	0.77229	destabilizing
4780	G81C	2flu	8.52282	destabilizing
4780	G81C	3zgc	3.42182	destabilizing
4780	G81D	2flu	14.318	destabilizing
4780	G81D	3zgc	10.4147	destabilizing
4780	G81S	2flu	7.88149	destabilizing
4780	G81S	3zgc	2.58347	destabilizing
4780	G81V	2flu	9.71221	destabilizing
4780	G81V	3zgc	4.55871	destabilizing
4780	T80I	2flu	-0.6881	stabilizing
4780	T80I	3zgc	-0.77036	stabilizing
4780	T80K	2flu	0.6743	destabilizing
4780	T80K	3zgc	0.74626	destabilizing
4780	T80P	2flu	0.9452	destabilizing
4780	T80R	2flu	1.183	destabilizing
4780	T80R	3zgc	0.73552	destabilizing
4851	C1692Y	3eto	-1.50244	stabilizing
4851	D2108N	1yyh	0.96024	destabilizing
4851	R1937H	2f8x	-0.96994	stabilizing
4851	R1937H	3nbn	1.383	destabilizing
4851	R1937H	3v79	1.0081	destabilizing
4851	R1962H	2f8x	-0.57215	stabilizing
4851	R1962H	3nbn	1.0879	destabilizing
4851	R1962S	2f8x	-0.80424	stabilizing
4851	R1962S	3v79	0.5425	destabilizing
4851	R2070Q	2f8x	1.44917	destabilizing
4851	R2070Q	3v79	-0.6057	stabilizing
4851	V2038E	2f8x	1.28639	destabilizing
4851	V2038E	3nbn	1.7998	destabilizing
4851	V2038E	3v79	2.2703	destabilizing
4851	V2038L	3nbn	0.9368	destabilizing
5290	D1017E	3hhm	-0.8997	stabilizing
5290	D1017E	3hiz	-1.1836	stabilizing
5290	D1017H	3hhm	-1.2054	stabilizing
5290	D1017V	3hhm	-0.8177	stabilizing
5290	D1017V	3hiz	-0.5546	stabilizing
5290	D1029H	3hiz	0.5753	destabilizing
5290	D549N	3hhm	0.7674	destabilizing
5290	E365K	3hiz	-0.5848	stabilizing
5290	E453A	3hiz	0.8062	destabilizing
5290	E453D	3hiz	0.7404	destabilizing
5290	E453G	2rd0	0.7756	destabilizing
5290	E453G	3hhm	0.6635	destabilizing
5290	E453G	3hiz	0.942	destabilizing
5290	E542K	3hhm	0.657	destabilizing
5290	E542K	3hiz	-0.5525	stabilizing
5290	E542Q	3hiz	-2.184	stabilizing
5290	E542R	3hhm	0.7929	destabilizing
5290	E542V	3hiz	-1.172	stabilizing
5290	E545A	3hhm	0.6938	destabilizing
5290	E545A	3hiz	0.8887	destabilizing
5290	E545D	3hhm	0.7259	destabilizing
5290	E545D	3hiz	0.823	destabilizing
5290	E545G	3hhm	1.575	destabilizing
5290	E545G	3hiz	1.2296	destabilizing
5290	E545V	3hhm	-1.3742	stabilizing
5290	E545V	3hiz	-0.9123	stabilizing
5290	H510Y	3hiz	-0.6251	stabilizing
5290	I31M	3hhm	2.1782	destabilizing
5290	I31M	3hiz	-0.7349	stabilizing
5290	I31V	2rd0	0.587	destabilizing
5290	I31V	3hhm	1.221	destabilizing
5290	I31V	3hiz	0.6124	destabilizing
5290	N345D	2rd0	1.8995	destabilizing
5290	N345D	3hhm	1.0882	destabilizing
5290	N345D	3hiz	3.1962	destabilizing
5290	N345H	3hhm	2.9449	destabilizing
5290	N345H	3hiz	1.9386	destabilizing
5290	N345I	2rd0	-0.6103	stabilizing
5290	N345I	3hiz	1.8866	destabilizing
5290	N345K	3hiz	1.4067	destabilizing
5290	N345S	3hhm	0.9972	destabilizing
5290	N345S	3hiz	2.3466	destabilizing
5290	N345T	3hhm	1.392	destabilizing
5290	N345T	3hiz	2.1297	destabilizing
5290	Q546E	3hhm	0.6696	destabilizing
5290	Q546E	3hiz	-1.0051	stabilizing
5290	Q546H	3hhm	1.0919	destabilizing
5290	Q546H	3hiz	-0.7151	stabilizing
5290	Q546K	3hiz	-1.3201	stabilizing
5290	Q546L	3hiz	-2.8079	stabilizing
5290	Q546P	3hhm	0.5293	destabilizing
5290	Q546P	3hiz	-1.3558	stabilizing
5290	Q546R	3hiz	-1.2097	stabilizing
5290	R349Q	3hhm	1.3891	destabilizing
5290	R79M	2rd0	-0.9907	stabilizing
5290	R79M	3hhm	-0.5332	stabilizing
5290	R79M	3hiz	-0.5526	stabilizing
5290	T544I	3hhm	-1.6207	stabilizing
5290	T544I	3hiz	-1.925	stabilizing
5290	T544N	3hhm	-0.5421	stabilizing
5290	T544N	3hiz	0.971	destabilizing
5290	W11L	2rd0	1.6277	destabilizing
5290	W11L	3hhm	1.5739	destabilizing
5290	W11L	3hiz	0.9354	destabilizing
5290	W11S	2rd0	1.9963	destabilizing
5290	W11S	3hhm	2.1225	destabilizing
5290	W11S	3hiz	1.5353	destabilizing
5295	D560G	3hiz	1.0165	destabilizing
5295	D560Y	3hhm	-0.7006	stabilizing
5295	D560Y	3hiz	1.4761	destabilizing
5295	G376R	3hhm	1.8882	destabilizing
5295	H669Q	1h9o	0.72548	destabilizing
5295	K379E	3hhm	0.7295	destabilizing
5295	K567E	3hhm	2.4593	destabilizing
5295	K567E	3hiz	1.3784	destabilizing
5295	N527K	3hhm	-2.4617	stabilizing
5295	N527K	3hiz	-1.2354	stabilizing
5295	N564D	2rd0	-0.9416	stabilizing
5295	N564D	3hhm	0.8294	destabilizing
5295	N564D	3hiz	0.7996	destabilizing
5295	Q572R	3hhm	1.2166	destabilizing
5295	R88L	2iui	-0.54675	stabilizing
5295	S565N	3hhm	1.186	destabilizing
5295	S565N	3hiz	1.185	destabilizing
5295	S565R	3hiz	1.2734	destabilizing
5295	V172M	1pbw	-0.7873	stabilizing
5295	Y463C	2rd0	1.1709	destabilizing
54880	C1649S	4hpl	0.8063	destabilizing
54880	W509C	3bim	3.48832	destabilizing
54880	W509C	3bim	0.6265	destabilizing
54894	H86Y	4kng	2.4155	destabilizing
54894	K108N	4kng	1.309	destabilizing
54894	M173T	4kng	0.9254	destabilizing
54894	M83T	4kng	1.9249	destabilizing
54894	S85F	4kng	1.7865	destabilizing
5518	E100K	2nyl	-1.0231	stabilizing
5518	E100K	2nym	-0.737	stabilizing
5518	E100K	3dw8	0.8745	destabilizing
5518	E100K	4i5n	-0.7304	stabilizing
5518	E216K	2nym	-0.6471	stabilizing
5518	E64G	2npp	-0.5654	stabilizing
5518	E64V	2npp	-1.5411	stabilizing
5518	G435R	1b3u	5.37753	destabilizing
5518	P179L	2nym	-0.508	stabilizing
5518	P179R	2npp	0.7206	destabilizing
5518	P179R	2nyl	0.9992	destabilizing
5518	P179R	2nym	0.6132	destabilizing
5518	P179R	3dw8	2.6304	destabilizing
5518	Q217K	2npp	2.2803	destabilizing
5518	Q217K	2nyl	3.1836	destabilizing
5518	Q217K	3dw8	-0.9823	stabilizing
5518	R183G	3dw8	0.887	destabilizing
5518	R183G	4i5l	2.2634	destabilizing
5518	R183G	4i5n	1.2297	destabilizing
5518	R183P	3dw8	1.1404	destabilizing
5518	R183P	4i5l	2.5073	destabilizing
5518	R183P	4i5n	1.1778	destabilizing
5518	R183Q	2nym	-0.9398	stabilizing
5518	R183Q	4i5l	2.2799	destabilizing
5518	R183Q	4i5n	1.0819	destabilizing
5518	R183W	3dw8	1.0166	destabilizing
5518	R258C	4i5l	1.178	destabilizing
5518	R258C	4i5n	1.1669	destabilizing
5518	R258H	4i5l	0.8678	destabilizing
5518	R258H	4i5n	0.8244	destabilizing
5518	R418W	2ie3	-0.8053	stabilizing
5518	R418W	2npp	-0.743	stabilizing
5518	R418W	2pkg	0.61261	destabilizing
5518	R418W	3c5w	-0.558	stabilizing
5518	R418W	3dw8	-0.58102	stabilizing
5518	R418W	4i5n	-0.7233	stabilizing
5518	R46S	4i5n	1.8613	destabilizing
5518	S219L	4i5l	-2.0828	stabilizing
5518	S219L	4i5n	-2.711	stabilizing
5518	S219W	2npp	0.5827	destabilizing
5518	S256F	2nyl	-0.5719	stabilizing
5518	S256F	3dw8	2.5453	destabilizing
5518	S256Y	3dw8	2.6486	destabilizing
5518	W140C	2npp	2.3518	destabilizing
5518	W140C	2nyl	2.0524	destabilizing
5518	W140C	2nym	1.6863	destabilizing
5518	W140C	3dw8	1.4888	destabilizing
5518	W140C	4i5l	3.2297	destabilizing
5518	W140C	4i5n	3.3887	destabilizing
5518	W257C	2npp	1.8574	destabilizing
5518	W257C	2nyl	1.685	destabilizing
5518	W257C	2nym	2.345	destabilizing
5518	W257C	3dw8	0.5297	destabilizing
5518	W257G	2npp	3.1048	destabilizing
5518	W257G	2nyl	2.3936	destabilizing
5518	W257G	2nym	3.192	destabilizing
5518	W257G	3dw8	1.3056	destabilizing
55193	N528I	3tlp	-0.942656	stabilizing
55294	D279Y	2ovp	6.0612	destabilizing
55294	D279Y	2ovq	2.0394	destabilizing
55294	D279Y	2ovr	5.5355	destabilizing
55294	F280L	2ovp	-0.6389	stabilizing
55294	F280L	2ovq	1.1155	destabilizing
55294	F280L	2ovr	0.7433	destabilizing
55294	R312G	2ovp	0.5997	destabilizing
55294	R312G	2ovq	0.889	destabilizing
55294	R312G	2ovr	1.0329	destabilizing
55294	R312S	2ovq	0.6184	destabilizing
55294	R312S	2ovr	1.2395	destabilizing
5604	L235H	3sls	0.6096	destabilizing
567	C100G	3low	5.057	destabilizing
567	C45G	3low	4.198	destabilizing
567	D54N	1py4	-1.45792	stabilizing
567	D54N	1r3h	-1.55974	stabilizing
567	D54N	1zt4	-0.7421	stabilizing
567	D54N	3rl2	-0.8574	stabilizing
567	F76C	1a6z	2.596	destabilizing
567	F76C	1de4	2.5725	destabilizing
567	F76C	1exu	3.2887	destabilizing
567	F76C	1gzp	2.3465	destabilizing
567	F76C	1kpr	3.3352	destabilizing
567	F76C	1ktl	3.0036	destabilizing
567	F76C	1mhe	4.0494	destabilizing
567	F76C	1onq	2.852	destabilizing
567	F76C	1uqs	2.1526	destabilizing
567	F76C	1w72	3.4721	destabilizing
567	F76C	1xz0	3.693	destabilizing
567	F76C	1ydp	3.7116	destabilizing
567	F76C	1zt4	3.2632	destabilizing
567	F76C	2d31	2.6732	destabilizing
567	F76C	2dyp	3.5953	destabilizing
567	F76C	2esv	3.3831	destabilizing
567	F76C	2xpg	3.8431	destabilizing
567	F76C	3am8	3.9487	destabilizing
567	F76C	3bze	3.4532	destabilizing
567	F76C	3bzf	3.3363	destabilizing
567	F76C	3cdg	3.2743	destabilizing
567	F76C	3cii	2.5921	destabilizing
567	F76C	3huj	2.977	destabilizing
567	F76C	3kyn	3.5147	destabilizing
567	F76C	3kyo	3.6406	destabilizing
567	F76C	3low	1.271	destabilizing
567	F76C	3loz	1.74971	destabilizing
567	F76C	3m17	3.4925	destabilizing
567	F76C	3m1b	2.8613	destabilizing
567	F76C	3mzt	2.1735	destabilizing
567	F76C	3rl1	2.7128	destabilizing
567	F76C	3rl2	2.8133	destabilizing
567	F76C	3sdx	4.5923	destabilizing
567	F76C	3t8x	3.3229	destabilizing
567	F76C	3tzv	3.651	destabilizing
567	F76C	3u0p	3.6756	destabilizing
567	F76C	3vwj	2.5385	destabilizing
567	F76C	3vwk	3.9262	destabilizing
567	F76C	4en3	3.7801	destabilizing
567	F76C	4gup	2.1294	destabilizing
567	F76C	4jqv	3.0196	destabilizing
567	F76C	4l4t	2.7427	destabilizing
567	F76C	4l4v	2.6335	destabilizing
567	F76L	1a6z	2.09	destabilizing
567	F76L	1de4	2.5616	destabilizing
567	F76L	1exu	3.8124	destabilizing
567	F76L	1gzp	1.9772	destabilizing
567	F76L	1kpr	2.4347	destabilizing
567	F76L	1ktl	2.5088	destabilizing
567	F76L	1mhe	3.9615	destabilizing
567	F76L	1onq	2.6325	destabilizing
567	F76L	1uqs	3.3727	destabilizing
567	F76L	1w72	2.5114	destabilizing
567	F76L	1xz0	2.8341	destabilizing
567	F76L	1ydp	2.385	destabilizing
567	F76L	1zt4	2.3072	destabilizing
567	F76L	2d31	2.0006	destabilizing
567	F76L	2dyp	1.7212	destabilizing
567	F76L	2esv	3.6123	destabilizing
567	F76L	2xpg	3.0041	destabilizing
567	F76L	3am8	3.9538	destabilizing
567	F76L	3bze	3.673	destabilizing
567	F76L	3bzf	2.5209	destabilizing
567	F76L	3cdg	2.1611	destabilizing
567	F76L	3cii	1.5227	destabilizing
567	F76L	3huj	2.585	destabilizing
567	F76L	3kyn	2.738	destabilizing
567	F76L	3kyo	2.432	destabilizing
567	F76L	3m17	3.8677	destabilizing
567	F76L	3m1b	2.5025	destabilizing
567	F76L	3mzt	1.9832	destabilizing
567	F76L	3rl1	2.031	destabilizing
567	F76L	3rl2	2.0714	destabilizing
567	F76L	3sdx	3.2352	destabilizing
567	F76L	3t8x	2.7023	destabilizing
567	F76L	3tzv	3.1249	destabilizing
567	F76L	3u0p	4.0198	destabilizing
567	F76L	3vwj	1.4175	destabilizing
567	F76L	3vwk	3.7581	destabilizing
567	F76L	4en3	2.9299	destabilizing
567	F76L	4gup	2.0559	destabilizing
567	F76L	4jqv	2.0992	destabilizing
567	F76L	4l4t	1.6164	destabilizing
567	F76L	4l4v	0.546	destabilizing
567	F82V	1a6z	1.0643	destabilizing
567	F82V	1exu	1.5523	destabilizing
567	F82V	1kpr	1.153	destabilizing
567	F82V	1ktl	0.7052	destabilizing
567	F82V	1mhe	-1.2088	stabilizing
567	F82V	1onq	-1.3752	stabilizing
567	F82V	1w72	1.2674	destabilizing
567	F82V	1xz0	0.687	destabilizing
567	F82V	1ydp	1.2356	destabilizing
567	F82V	2d31	0.7138	destabilizing
567	F82V	2dyp	1.1162	destabilizing
567	F82V	2xpg	1.1494	destabilizing
567	F82V	3am8	1.1829	destabilizing
567	F82V	3bze	0.7235	destabilizing
567	F82V	3bzf	0.8503	destabilizing
567	F82V	3cdg	1.0092	destabilizing
567	F82V	3cii	1.1514	destabilizing
567	F82V	3huj	0.515	destabilizing
567	F82V	3kyn	1.4286	destabilizing
567	F82V	3kyo	0.9646	destabilizing
567	F82V	3low	1.105	destabilizing
567	F82V	3m17	1.7258	destabilizing
567	F82V	3m1b	0.6948	destabilizing
567	F82V	3rl1	1.0817	destabilizing
567	F82V	3rl2	1.2099	destabilizing
567	F82V	3sdx	1.3046	destabilizing
567	F82V	3tzv	0.8106	destabilizing
567	F82V	3u0p	1.5922	destabilizing
567	F82V	3vwj	0.7352	destabilizing
567	F82V	3vwk	0.5065	destabilizing
567	F82V	4e0k	1.81837	destabilizing
567	F82V	4e0l	1.12092	destabilizing
567	F82V	4en3	1.0905	destabilizing
567	F82V	4gup	1.1993	destabilizing
567	F82V	4jqv	1.2387	destabilizing
567	F82V	4l4t	1.2975	destabilizing
567	F82V	4l4v	1.8344	destabilizing
567	H51P	1a6z	0.7736	destabilizing
567	H51P	1exu	1.5686	destabilizing
567	H51P	1gzp	0.6971	destabilizing
567	H51P	1kpr	1.0501	destabilizing
567	H51P	1ktl	2.5107	destabilizing
567	H51P	1mhe	1.4919	destabilizing
567	H51P	1onq	-1.6034	stabilizing
567	H51P	1uqs	0.746	destabilizing
567	H51P	1w72	1.1995	destabilizing
567	H51P	1ydp	1.7963	destabilizing
567	H51P	1zt4	0.6877	destabilizing
567	H51P	2d31	0.5868	destabilizing
567	H51P	2dyp	1.1644	destabilizing
567	H51P	2esv	0.9654	destabilizing
567	H51P	2xpg	0.8085	destabilizing
567	H51P	3am8	1.2597	destabilizing
567	H51P	3bze	1.0309	destabilizing
567	H51P	3bzf	1.0092	destabilizing
567	H51P	3cdg	1.0314	destabilizing
567	H51P	3cii	-0.8859	stabilizing
567	H51P	3cii	0.95321	destabilizing
567	H51P	3kyn	1.3853	destabilizing
567	H51P	3kyo	1.7367	destabilizing
567	H51P	3low	2.089	destabilizing
567	H51P	3m17	1.6932	destabilizing
567	H51P	3m1b	1.4467	destabilizing
567	H51P	3mzt	1.312	destabilizing
567	H51P	3sdx	2.4495	destabilizing
567	H51P	3t8x	0.7988	destabilizing
567	H51P	3u0p	1.2037	destabilizing
567	H51P	3vwk	1.1269	destabilizing
567	H51P	4en3	0.7617	destabilizing
567	H51P	4gup	0.7471	destabilizing
567	H51P	4jqv	1.12	destabilizing
567	H51P	4l4v	1.2984	destabilizing
567	H71N	3mzt	0.528	destabilizing
567	I66N	3low	0.729	destabilizing
567	K26E	1mhe	0.5412	destabilizing
567	K26E	1ydp	0.6089	destabilizing
567	K26E	2d31	0.5049	destabilizing
567	K26E	2dyp	0.52269	destabilizing
567	K26E	4f7t	0.5262	destabilizing
567	K26E	4l4v	1.31104	destabilizing
567	L43P	2e8d	0.66985	destabilizing
567	L43P	3low	9.26	destabilizing
567	L43R	3low	3.488	destabilizing
567	L84R	3mzt	1.0825	destabilizing
567	M119L	1a6z	-0.9662	stabilizing
567	M119L	1de4	-0.7726	stabilizing
567	M119L	1exu	-1.1895	stabilizing
567	M119L	1gzp	0.731	destabilizing
567	M119L	1ktl	1.0964	destabilizing
567	M119L	1uqs	0.5156	destabilizing
567	M119L	1w72	-1.0727	stabilizing
567	M119L	2esv	-0.605	stabilizing
567	M119L	3cii	0.7682	destabilizing
567	M119L	3kyn	0.6331	destabilizing
567	M119L	3m1b	-0.855	stabilizing
567	M119L	3rl1	1.3194	destabilizing
567	M119L	3u0p	0.7235	destabilizing
567	M119L	4jqv	0.5162	destabilizing
567	N44I	1kpr	1.7064	destabilizing
567	N44I	1ktl	1.4987	destabilizing
567	N44I	1mhe	1.2842	destabilizing
567	N44I	1w72	1.3532	destabilizing
567	N44I	1ydp	1.1732	destabilizing
567	N44I	2dyp	0.8556	destabilizing
567	N44I	2esv	1.3098	destabilizing
567	N44I	2xpg	1.2862	destabilizing
567	N44I	3am8	1.0173	destabilizing
567	N44I	3bze	1.2114	destabilizing
567	N44I	3bzf	1.4936	destabilizing
567	N44I	3cdg	1.2915	destabilizing
567	N44I	3kyn	1.1044	destabilizing
567	N44I	3kyo	1.283	destabilizing
567	N44I	3low	-1.144	stabilizing
567	N44I	3m1b	-0.5685	stabilizing
567	N44I	3rl1	1.2487	destabilizing
567	N44I	3rl2	1.1421	destabilizing
567	N44I	3tzv	0.6632	destabilizing
567	N44I	4gup	1.1009	destabilizing
567	N44I	4jqv	1.4211	destabilizing
567	N44I	4l4t	0.9441	destabilizing
567	N44I	4l4v	1.111	destabilizing
567	N62T	3low	2.728	destabilizing
567	N62T	3rew	-0.71566	stabilizing
567	V113G	3low	1.903	destabilizing
567	V47M	2e8d	-1.14774	stabilizing
567	V47M	3low	1.785	destabilizing
567	Y30H	1a6z	2.0504	destabilizing
567	Y30H	1de4	1.913	destabilizing
567	Y30H	1exu	1.879	destabilizing
567	Y30H	1gzp	2.048	destabilizing
567	Y30H	1kpr	1.4878	destabilizing
567	Y30H	1ktl	1.5038	destabilizing
567	Y30H	1mhe	1.3584	destabilizing
567	Y30H	1onq	2.3745	destabilizing
567	Y30H	1uqs	1.4389	destabilizing
567	Y30H	1w72	1.4208	destabilizing
567	Y30H	1xz0	1.8787	destabilizing
567	Y30H	1ydp	2.0051	destabilizing
567	Y30H	1zt4	1.5331	destabilizing
567	Y30H	2d31	1.4859	destabilizing
567	Y30H	2dyp	1.4016	destabilizing
567	Y30H	2esv	1.4564	destabilizing
567	Y30H	2xpg	1.2093	destabilizing
567	Y30H	3am8	1.5451	destabilizing
567	Y30H	3bze	1.6781	destabilizing
567	Y30H	3bzf	1.2928	destabilizing
567	Y30H	3cdg	1.986	destabilizing
567	Y30H	3cii	1.8022	destabilizing
567	Y30H	3huj	2.1924	destabilizing
567	Y30H	3kyn	1.2895	destabilizing
567	Y30H	3kyo	1.3701	destabilizing
567	Y30H	3m17	2.0062	destabilizing
567	Y30H	3m1b	1.7693	destabilizing
567	Y30H	3rl1	1.5653	destabilizing
567	Y30H	3rl2	1.3413	destabilizing
567	Y30H	3sdx	2.5968	destabilizing
567	Y30H	3t8x	2.2462	destabilizing
567	Y30H	3tzv	1.9304	destabilizing
567	Y30H	3u0p	2.3427	destabilizing
567	Y30H	3vwk	1.6144	destabilizing
567	Y30H	4en3	1.7062	destabilizing
567	Y30H	4gup	2.1624	destabilizing
567	Y30H	4jqv	1.4991	destabilizing
567	Y30H	4l4t	2.1768	destabilizing
567	Y30H	4l4v	2.1444	destabilizing
567	Y83F	1mhe	-0.9188	stabilizing
567	Y83F	2esv	-0.5051	stabilizing
567	Y83F	4e0k	0.557	destabilizing
567	Y83F	4e0l	-0.71465	stabilizing
567	Y86N	3low	2.39	destabilizing
567	Y98C	3low	1.35	destabilizing
567	Y98D	3low	2.664	destabilizing
567	Y98N	3low	1.434	destabilizing
5728	H397Q	2kyl	-1.20666	stabilizing
5728	H397Y	2kyl	-0.58115	stabilizing
5728	T398S	2kyl	1.44551	destabilizing
5728	T401I	2kyl	-1.24617	stabilizing
5781	E139G	4jeg	1.5997	destabilizing
5781	I54T	4je4	0.7439	destabilizing
5781	K55N	4je4	0.5969	destabilizing
5781	V181I	4jeg	0.5236	destabilizing
5781	V181L	4jeg	0.7325	destabilizing
5925	E533G	1n4m	2.4776	destabilizing
5925	E533G	1o9k	1.6282	destabilizing
5925	E533K	1n4m	1.4937	destabilizing
5925	E533K	1o9k	0.7404	destabilizing
5925	F839L	2aze	1.1388	destabilizing
5925	K873E	1h25	1.0148	destabilizing
5925	K873E	3n5u	0.5109	destabilizing
5925	K96M	2r7g	-0.7354	stabilizing
5925	K96R	2r7g	-0.7477	stabilizing
5925	R857H	2aze	0.931	destabilizing
5925	R876C	3n5u	0.517	destabilizing
596	G128E	2xa0	15.6321	destabilizing
596	G128R	2xa0	24.8698	destabilizing
596	T132S	2xa0	1.26211	destabilizing
5979	A764T	2x2m	1.4356	destabilizing
5979	P766S	2ivs	2.6742	destabilizing
5979	P766S	2x2m	2.3456	destabilizing
5979	R912L	2ivs	-0.553	stabilizing
5979	R912L	2x2m	-0.7828	stabilizing
5979	R912Q	2ivs	-0.8514	stabilizing
5979	R912W	2ivs	-2.2905	stabilizing
5979	R912W	2x2m	-0.609	stabilizing
5979	V706A	2x2m	1.5966	destabilizing
6416	G85R	3aln	11.4709	destabilizing
6416	S90F	3aln	-1.146	stabilizing
6502	E116D	1fs2	-1.6872	stabilizing
6502	E116D	2ass	1.1595	destabilizing
6502	E116D	2ast	1.3199	destabilizing
6502	E134V	1ldk	-0.713168	stabilizing
6502	H392R	2ast	-1.0258	stabilizing
6502	R154Q	1fqv	0.8525	destabilizing
6502	R154Q	2ass	0.6958	destabilizing
6502	R154Q	2ast	1.5994	destabilizing
6502	S291R	2ast	-2.1061	stabilizing
672	D1813H	1t29	-0.90946	stabilizing
672	D96H	1jm7	0.7068	destabilizing
672	Q1811L	1t29	-0.83696	stabilizing
672	R1649I	3pxe	-0.6956	stabilizing
673	D449N	4e+26	0.6611	destabilizing
673	E586K	2fb8	-1.3651	stabilizing
673	E586K	3d4q	-0.8019	stabilizing
673	E586K	3ii5	-0.6044	stabilizing
673	E586K	3psd	-0.5651	stabilizing
673	E586K	3q4c	-0.69559	stabilizing
673	E586K	3q96	-0.67329	stabilizing
673	E586K	4dbn	-0.563	stabilizing
673	E586K	4e4x	-1.0534	stabilizing
673	E586K	4g9r	-1.1155	stabilizing
673	E586K	4h58	-1.1046	stabilizing
673	E586K	4ksp	-1.1381	stabilizing
673	E586K	4ksq	-1.0661	stabilizing
673	K475M	4g9r	-0.9715	stabilizing
673	L588P	3d4q	1.2207	destabilizing
673	L588P	3ii5	0.5216	destabilizing
673	L588P	3psd	0.5829	destabilizing
673	L588P	3tv4	0.9499	destabilizing
673	L588P	4dbn	1.173	destabilizing
673	L588P	4ehe	1.1655	destabilizing
673	L588P	4g9r	1.2062	destabilizing
673	L588P	4h58	0.5512	destabilizing
673	L588P	4ksq	0.686	destabilizing
673	L588R	3psd	0.5346	destabilizing
673	L588R	3q4c	-0.64259	stabilizing
673	L588R	4dbn	0.579	destabilizing
673	L588R	4ehe	0.7438	destabilizing
673	L588R	4g9r	0.678	destabilizing
673	W450L	1uwh	1.1856	destabilizing
673	W450L	1uwj	1.2802	destabilizing
673	W450L	3c4c	1.04733	destabilizing
673	W450L	3d4q	1.5423	destabilizing
673	W450L	3ii5	0.7845	destabilizing
673	W450L	3prf	1.501	destabilizing
673	W450L	3psd	1.4774	destabilizing
673	W450L	3q4c	0.52286	destabilizing
673	W450L	3q96	-1.45829	stabilizing
673	W450L	3skc	0.9087	destabilizing
673	W450L	3tv4	1.092	destabilizing
673	W450L	3tv6	1.3354	destabilizing
673	W450L	4dbn	1.5404	destabilizing
673	W450L	4e4x	1.0982	destabilizing
673	W450L	4ehe	1.2107	destabilizing
673	W450L	4ehg	0.9983	destabilizing
673	W450L	4fk3	1.3983	destabilizing
673	W450L	4g9r	1.2164	destabilizing
673	W450L	4h58	0.766	destabilizing
673	W450L	4jvg	1.3612	destabilizing
673	W450L	4ksp	1.2408	destabilizing
673	W450L	4ksq	1.2538	destabilizing
6794	G171S	2wtk	0.542	destabilizing
6794	P203L	2wtk	-3.0688	stabilizing
7128	L12F	3zje	-1.3464	stabilizing
7128	M15I	3zjg	1.3579	destabilizing
7128	V613M	3oj4	-1.09942	stabilizing
7157	A347G	1olg	0.60294	destabilizing
7157	A347G	1olh	0.80584	destabilizing
7157	A347G	1sae	0.83679	destabilizing
7157	A347G	1sak	1.00104	destabilizing
7157	A347G	1sal	0.61396	destabilizing
7157	A347G	3sak	0.96915	destabilizing
7157	A347T	1a1u	0.7995	destabilizing
7157	A347T	1saf	0.77403	destabilizing
7157	A347T	1sal	0.7997	destabilizing
7157	A364T	2foj	3.74634	destabilizing
7157	C176F	1tsr	0.5718	destabilizing
7157	C176F	2ady	5.44711	destabilizing
7157	C176F	3ts8	4.89351	destabilizing
7157	C176F	4hje	4.20217	destabilizing
7157	C176R	2ady	2.24927	destabilizing
7157	C176R	3ts8	5.08967	destabilizing
7157	C176R	4hje	3.79021	destabilizing
7157	C176W	1tsr	0.84612	destabilizing
7157	C176W	1tup	0.77756	destabilizing
7157	C176W	2ady	8.59349	destabilizing
7157	C176W	3ts8	6.85508	destabilizing
7157	C176W	4hje	4.70511	destabilizing
7157	C176Y	1tsr	0.90851	destabilizing
7157	C176Y	1tup	1.06172	destabilizing
7157	C176Y	2ady	6.54833	destabilizing
7157	C176Y	3ts8	5.79352	destabilizing
7157	C176Y	4hje	2.26843	destabilizing
7157	C182Y	1ycs	5.19259	destabilizing
7157	C242F	2ybg	0.74095	destabilizing
7157	C242F	4hje	0.656205	destabilizing
7157	C242R	2ybg	4.32931	destabilizing
7157	C242R	3q05	0.50689	destabilizing
7157	C242R	4hje	1.11403	destabilizing
7157	C242W	2ybg	5.30591	destabilizing
7157	C242W	4hje	-0.56753	stabilizing
7157	C242Y	2ybg	1.80214	destabilizing
7157	D148Y	4ibq	-0.81605	stabilizing
7157	D148Y	4kvp	-0.83008	stabilizing
7157	D259E	4ibs	0.63667	destabilizing
7157	D259E	4ibt	3.58971	destabilizing
7157	D259G	4ibt	2.47533	destabilizing
7157	D259H	2j1y	1.11383	destabilizing
7157	D259H	4ibq	-0.63028	stabilizing
7157	D259H	4ibs	-0.60568	stabilizing
7157	D259H	4ibt	3.11476	destabilizing
7157	D259N	2j1y	-1.16677	stabilizing
7157	D259N	4ibq	-0.50999	stabilizing
7157	D259N	4ibt	2.05065	destabilizing
7157	D259S	4ibq	-0.51181	stabilizing
7157	D259S	4ibs	-0.7044	stabilizing
7157	D259S	4ibt	2.22874	destabilizing
7157	D259V	2j1y	-1.0748	stabilizing
7157	D259V	4ibq	-0.94359	stabilizing
7157	D259V	4ibs	-0.84503	stabilizing
7157	D259V	4ibt	3.32167	destabilizing
7157	D259V	4ibz	-0.70683	stabilizing
7157	D259V	4lo9	-0.653637	stabilizing
7157	D259Y	4ibq	-0.76138	stabilizing
7157	D259Y	4ibs	-1.24852	stabilizing
7157	D259Y	4ibt	5.29138	destabilizing
7157	D259Y	4ibz	-0.76454	stabilizing
7157	E171A	1gzh	0.7645	destabilizing
7157	E171A	1tsr	1.21365	destabilizing
7157	E171A	1tup	1.83345	destabilizing
7157	E171D	1gzh	1.04979	destabilizing
7157	E171D	1tsr	1.64365	destabilizing
7157	E171D	1tup	1.56275	destabilizing
7157	E171D	4iby	1.05592	destabilizing
7157	E171G	1gzh	0.79785	destabilizing
7157	E171G	1tsr	1.58237	destabilizing
7157	E171G	1tup	2.28256	destabilizing
7157	E171K	1gzh	-0.8965	stabilizing
7157	E171K	1tsr	0.75003	destabilizing
7157	E171K	1tup	1.28886	destabilizing
7157	E171Q	1tup	1.11036	destabilizing
7157	E171V	1tup	0.52251	destabilizing
7157	E171V	4iby	-0.87771	stabilizing
7157	E180G	1tup	0.54829	destabilizing
7157	E180G	3kmd	0.99097	destabilizing
7157	E180K	1tup	0.58508	destabilizing
7157	E180K	4hje	0.906622	destabilizing
7157	E180Q	1tsr	-1.05262	stabilizing
7157	E198K	2wgx	-0.80137	stabilizing
7157	E198Q	2wgx	-1.27084	stabilizing
7157	E224G	2wgx	0.52506	destabilizing
7157	E326K	1pes	0.6168	destabilizing
7157	E326K	2j0z	0.5567	destabilizing
7157	E349K	2j10	0.8775	destabilizing
7157	F212I	1tsr	0.83937	destabilizing
7157	F212I	1tup	0.90958	destabilizing
7157	F212S	1tsr	1.52112	destabilizing
7157	F212S	1tup	0.54558	destabilizing
7157	F212S	4iby	1.32157	destabilizing
7157	F212V	1tsr	1.61646	destabilizing
7157	F212V	1tup	1.06371	destabilizing
7157	F212V	4iby	0.6645	destabilizing
7157	F328S	1a1u	1.9841	destabilizing
7157	F328S	1hs5	0.8124	destabilizing
7157	F328S	1pes	1.7925	destabilizing
7157	F328S	1pet	2.3025	destabilizing
7157	F328S	2j0z	1.2251	destabilizing
7157	F328S	2j11	1.1957	destabilizing
7157	F328S	3q01	2.9252	destabilizing
7157	F328V	1a1u	1.4886	destabilizing
7157	F328V	1hs5	-0.5306	stabilizing
7157	F328V	1pes	0.9948	destabilizing
7157	F328V	1pet	2.6598	destabilizing
7157	F328V	2j0z	0.9192	destabilizing
7157	F328V	2j10	-0.9254	stabilizing
7157	F328V	2j11	1.6033	destabilizing
7157	F328V	3q01	1.5207	destabilizing
7157	F338I	1a1u	0.6555	destabilizing
7157	F338I	1hs5	0.8626	destabilizing
7157	F338I	1pes	0.8593	destabilizing
7157	F338I	1pet	0.7231	destabilizing
7157	F338I	2j0z	0.7407	destabilizing
7157	F338I	2j10	1.398	destabilizing
7157	F338I	3q01	1.6625	destabilizing
7157	F338L	1hs5	0.6955	destabilizing
7157	F338L	1pes	1.3595	destabilizing
7157	F338L	1pet	2.0449	destabilizing
7157	F338L	2j0z	0.8433	destabilizing
7157	F338L	3q01	0.895	destabilizing
7157	F341C	1hs5	0.9209	destabilizing
7157	F341C	1pes	1.8206	destabilizing
7157	F341C	1pes	0.53586	destabilizing
7157	F341C	1pet	3.7029	destabilizing
7157	F341C	2j0z	1.3676	destabilizing
7157	F341C	2j10	1.2299	destabilizing
7157	F341C	2j11	1.123	destabilizing
7157	F341C	3q01	1.5972	destabilizing
7157	F341L	1hs5	-0.6495	stabilizing
7157	F341L	1pes	0.8025	destabilizing
7157	F341L	1pet	1.7732	destabilizing
7157	F341L	2j0z	5.2593	destabilizing
7157	F341L	2j10	0.6847	destabilizing
7157	F341L	3q01	0.6309	destabilizing
7157	F341S	1hs5	1.6986	destabilizing
7157	F341S	1pes	2.8397	destabilizing
7157	F341S	1pes	0.61897	destabilizing
7157	F341S	1pet	4.5096	destabilizing
7157	F341S	2j0z	2.4548	destabilizing
7157	F341S	2j10	0.7189	destabilizing
7157	F341S	2j10	-0.588329	stabilizing
7157	F341S	2j11	1.894	destabilizing
7157	F341S	2j11	-0.661707	stabilizing
7157	F341S	3q01	2.362	destabilizing
7157	F54L	2ly4	1.3388	destabilizing
7157	G105A	4ibq	0.9642	destabilizing
7157	G105A	4ibs	0.63846	destabilizing
7157	G105A	4ibt	1.05502	destabilizing
7157	G105A	4ibz	0.69607	destabilizing
7157	G105C	4ibq	0.84601	destabilizing
7157	G105C	4ibs	1.17157	destabilizing
7157	G105C	4ibt	1.54197	destabilizing
7157	G105C	4ibz	0.71072	destabilizing
7157	G105D	4ibq	1.0099	destabilizing
7157	G105D	4ibs	2.0002	destabilizing
7157	G105D	4ibt	2.04476	destabilizing
7157	G105D	4ibz	1.84733	destabilizing
7157	G105R	4ibq	5.73771	destabilizing
7157	G105R	4ibs	4.95415	destabilizing
7157	G105R	4ibt	8.90132	destabilizing
7157	G105R	4ibz	7.36801	destabilizing
7157	G105S	4ibq	1.02745	destabilizing
7157	G105S	4ibs	1.28348	destabilizing
7157	G105S	4ibt	1.46025	destabilizing
7157	G105S	4ibz	1.00243	destabilizing
7157	G105V	4ibq	1.37779	destabilizing
7157	G105V	4ibs	1.80699	destabilizing
7157	G105V	4ibt	2.32398	destabilizing
7157	G105V	4ibz	1.41746	destabilizing
7157	G244A	1gzh	2.17801	destabilizing
7157	G244A	1kzy	2.87154	destabilizing
7157	G244A	2ac0	2.29846	destabilizing
7157	G244A	2ady	2.75312	destabilizing
7157	G244A	2ahi	1.90466	destabilizing
7157	G244A	2ata	1.34781	destabilizing
7157	G244A	3kmd	0.979328	destabilizing
7157	G244A	3q05	1.05283	destabilizing
7157	G244A	3q06	1.29426	destabilizing
7157	G244A	3ts8	0.98662	destabilizing
7157	G244A	4hje	0.838418	destabilizing
7157	G244A	4ibu	1.86355	destabilizing
7157	G244A	4iby	1.6119	destabilizing
7157	G244C	1gzh	4.80288	destabilizing
7157	G244C	1kzy	4.42713	destabilizing
7157	G244C	2ac0	1.50444	destabilizing
7157	G244C	2ady	4.17743	destabilizing
7157	G244C	2ahi	1.63258	destabilizing
7157	G244C	2ata	1.75251	destabilizing
7157	G244C	3kmd	1.63143	destabilizing
7157	G244C	3q05	1.00504	destabilizing
7157	G244C	3q06	2.58185	destabilizing
7157	G244C	3ts8	1.74646	destabilizing
7157	G244C	4hje	0.925571	destabilizing
7157	G244C	4ibu	2.07468	destabilizing
7157	G244C	4iby	2.99247	destabilizing
7157	G244D	1gzh	9.81341	destabilizing
7157	G244D	1kzy	4.40696	destabilizing
7157	G244D	2ac0	4.78813	destabilizing
7157	G244D	2ady	7.78774	destabilizing
7157	G244D	2ahi	2.60217	destabilizing
7157	G244D	2ata	2.67239	destabilizing
7157	G244D	3kmd	2.00175	destabilizing
7157	G244D	3q05	4.69941	destabilizing
7157	G244D	3q06	4.94996	destabilizing
7157	G244D	3ts8	4.96328	destabilizing
7157	G244D	4hje	1.04107	destabilizing
7157	G244D	4ibu	2.67751	destabilizing
7157	G244D	4iby	9.3267	destabilizing
7157	G244E	1gzh	4.97743	destabilizing
7157	G244E	1kzy	4.19264	destabilizing
7157	G244E	2ac0	4.12427	destabilizing
7157	G244E	2ady	5.74766	destabilizing
7157	G244E	2ahi	3.24691	destabilizing
7157	G244E	2ata	1.56583	destabilizing
7157	G244E	3kmd	2.67487	destabilizing
7157	G244E	3q05	5.75555	destabilizing
7157	G244E	3q06	4.27606	destabilizing
7157	G244E	3ts8	3.09014	destabilizing
7157	G244E	4hje	1.28424	destabilizing
7157	G244E	4ibu	2.22993	destabilizing
7157	G244E	4iby	3.5267	destabilizing
7157	G244R	1gzh	16.5225	destabilizing
7157	G244R	1kzy	1.98287	destabilizing
7157	G244R	2ac0	3.97377	destabilizing
7157	G244R	2ady	4.09422	destabilizing
7157	G244R	2ahi	3.38857	destabilizing
7157	G244R	2ata	3.66078	destabilizing
7157	G244R	3kmd	4.35711	destabilizing
7157	G244R	3q05	4.76639	destabilizing
7157	G244R	3q06	3.7906	destabilizing
7157	G244R	3ts8	4.17015	destabilizing
7157	G244R	4hje	4.03646	destabilizing
7157	G244R	4ibu	2.10169	destabilizing
7157	G244R	4iby	6.0346	destabilizing
7157	G244S	1gzh	4.97457	destabilizing
7157	G244S	1kzy	2.72341	destabilizing
7157	G244S	2ac0	2.13603	destabilizing
7157	G244S	2ady	4.70921	destabilizing
7157	G244S	2ahi	1.91765	destabilizing
7157	G244S	2ata	1.6022	destabilizing
7157	G244S	3kmd	1.34901	destabilizing
7157	G244S	3q05	2.09946	destabilizing
7157	G244S	3q06	2.45897	destabilizing
7157	G244S	3ts8	1.80893	destabilizing
7157	G244S	4hje	1.05905	destabilizing
7157	G244S	4ibu	3.53617	destabilizing
7157	G244S	4iby	2.61735	destabilizing
7157	G244V	1gzh	5.0127	destabilizing
7157	G244V	1kzy	2.55285	destabilizing
7157	G244V	2ac0	4.10483	destabilizing
7157	G244V	2ady	5.77366	destabilizing
7157	G244V	2ahi	2.83365	destabilizing
7157	G244V	2ata	2.5579	destabilizing
7157	G244V	3kmd	3.30858	destabilizing
7157	G244V	3q05	2.60982	destabilizing
7157	G244V	3q06	4.97345	destabilizing
7157	G244V	3ts8	2.63071	destabilizing
7157	G244V	4hje	2.11076	destabilizing
7157	G244V	4ibu	4.32522	destabilizing
7157	G244V	4iby	5.84349	destabilizing
7157	G266E	4ibs	0.64096	destabilizing
7157	G266E	4ibt	0.62541	destabilizing
7157	G266E	4ibz	0.64058	destabilizing
7157	G266R	4ibs	0.77367	destabilizing
7157	G266R	4ibt	1.57175	destabilizing
7157	G266R	4ibz	0.51792	destabilizing
7157	G266S	4ibt	0.5893	destabilizing
7157	G325A	1pes	0.9666	destabilizing
7157	G325E	1pes	0.9311	destabilizing
7157	G325V	1pes	2.0318	destabilizing
7157	G325V	3q01	1.4798	destabilizing
7157	G334A	1a1u	-0.643	stabilizing
7157	G334A	1pes	-0.8577	stabilizing
7157	G334A	1pet	-0.7835	stabilizing
7157	G334V	2j0z	1.317	destabilizing
7157	G334V	3q01	0.6441	destabilizing
7157	G334W	1a1u	-0.8971	stabilizing
7157	G334W	1hs5	1.8354	destabilizing
7157	G334W	1pes	-0.821	stabilizing
7157	G334W	2j10	0.979	destabilizing
7157	H178D	1ycs	1.93662	destabilizing
7157	H178D	2ac0	1.73032	destabilizing
7157	H178D	2ady	1.19514	destabilizing
7157	H178D	2ahi	2.25939	destabilizing
7157	H178D	2ata	1.55332	destabilizing
7157	H178D	2ybg	3.50744	destabilizing
7157	H178D	3kmd	0.755698	destabilizing
7157	H178D	3q05	1.27584	destabilizing
7157	H178D	3q06	1.07113	destabilizing
7157	H178D	3ts8	1.54763	destabilizing
7157	H178D	4ibu	1.30387	destabilizing
7157	H178D	4iby	1.02918	destabilizing
7157	H178L	1ycs	-0.9252	stabilizing
7157	H178L	2ady	-1.14103	stabilizing
7157	H178L	2ata	-0.88187	stabilizing
7157	H178L	2ybg	0.76646	destabilizing
7157	H178L	3q05	-1.71372	stabilizing
7157	H178L	3q06	-1.89249	stabilizing
7157	H178L	3ts8	-1.31005	stabilizing
7157	H178L	4hje	-0.92861	stabilizing
7157	H178L	4ibu	-0.85217	stabilizing
7157	H178N	1ycs	1.3919	destabilizing
7157	H178N	2ac0	0.84183	destabilizing
7157	H178N	2ady	0.75063	destabilizing
7157	H178N	2ahi	0.75342	destabilizing
7157	H178N	2ata	0.75526	destabilizing
7157	H178N	2ybg	1.64343	destabilizing
7157	H178N	3kmd	0.575686	destabilizing
7157	H178N	3q05	0.77098	destabilizing
7157	H178N	3ts8	0.85847	destabilizing
7157	H178N	4hje	0.550648	destabilizing
7157	H178N	4ibu	0.75462	destabilizing
7157	H178N	4iby	0.65294	destabilizing
7157	H178P	1ycs	1.0359	destabilizing
7157	H178P	2ady	-0.8725	stabilizing
7157	H178P	2ahi	-0.52163	stabilizing
7157	H178P	2ata	0.66628	destabilizing
7157	H178P	2ybg	3.5546	destabilizing
7157	H178P	3kmd	-1.09029	stabilizing
7157	H178P	4hje	-0.8414	stabilizing
7157	H178P	4ibu	-0.90872	stabilizing
7157	H178P	4iby	1.18974	destabilizing
7157	H178Q	2ybg	2.73783	destabilizing
7157	H178Q	3q06	-1.66839	stabilizing
7157	H178Q	4hje	-1.57069	stabilizing
7157	H178Y	1ycs	0.6588	destabilizing
7157	H178Y	2ac0	-1.11692	stabilizing
7157	H178Y	2ady	-1.3641	stabilizing
7157	H178Y	2ahi	-1.0296	stabilizing
7157	H178Y	2ata	-1.03892	stabilizing
7157	H178Y	2ybg	1.94544	destabilizing
7157	H178Y	3kmd	-0.93696	stabilizing
7157	H178Y	3q05	-1.16752	stabilizing
7157	H178Y	3q06	-0.89005	stabilizing
7157	H178Y	3ts8	-1.18932	stabilizing
7157	H178Y	4hje	-0.84263	stabilizing
7157	H178Y	4ibu	-1.2084	stabilizing
7157	H179D	1ycs	0.6863	destabilizing
7157	H179P	2ac0	0.79788	destabilizing
7157	H179P	2ady	0.77103	destabilizing
7157	H179P	2ata	0.54891	destabilizing
7157	H179P	3ts8	0.87453	destabilizing
7157	H179P	4hje	0.774225	destabilizing
7157	H179Y	2ata	-0.75505	stabilizing
7157	H233D	2wgx	1.43754	destabilizing
7157	H233P	2wgx	0.72985	destabilizing
7157	H233R	2wgx	1.03595	destabilizing
7157	H233Y	2wgx	-0.79717	stabilizing
7157	I332V	1a1u	1.6283	destabilizing
7157	K101N	2j1w	0.665293	destabilizing
7157	K101N	2j1x	0.630193	destabilizing
7157	K101N	2j1z	0.621025	destabilizing
7157	K101N	2j20	0.697531	destabilizing
7157	K101N	2x0w	0.591971	destabilizing
7157	K101N	3kz8	0.63663	destabilizing
7157	K101N	3zme	0.580883	destabilizing
7157	K101N	4agl	0.660845	destabilizing
7157	K101N	4agm	0.709803	destabilizing
7157	K101N	4agn	0.582945	destabilizing
7157	K101N	4ago	0.62315	destabilizing
7157	K101N	4agp	0.73125	destabilizing
7157	K101N	4agq	0.68062	destabilizing
7157	K101R	2j1z	-0.64247	stabilizing
7157	K101R	2j21	-1.20865	stabilizing
7157	K101R	4ago	-0.62904	stabilizing
7157	K101R	4agp	-0.59876	stabilizing
7157	K101R	4agq	-0.69418	stabilizing
7157	K351E	1a1u	1.4983	destabilizing
7157	K351E	1sae	1.56156	destabilizing
7157	K351E	1saf	1.60978	destabilizing
7157	K351E	1sak	1.75856	destabilizing
7157	K351E	1sal	3.17256	destabilizing
7157	K351E	3sak	2.15399	destabilizing
7157	K351N	1a1u	0.8018	destabilizing
7157	K351N	1sae	1.28545	destabilizing
7157	K351N	1saf	1.34534	destabilizing
7157	K351N	1sak	1.3285	destabilizing
7157	K351N	1sal	2.76324	destabilizing
7157	K351N	3sak	1.50435	destabilizing
7157	K381N	1h26	0.80429	destabilizing
7157	L264I	4ibz	0.50112	destabilizing
7157	L264P	4ibz	0.83557	destabilizing
7157	L264R	4ibz	1.22584	destabilizing
7157	L264V	4ibz	0.65867	destabilizing
7157	L265M	4ibq	0.51453	destabilizing
7157	L265M	4ibz	0.67861	destabilizing
7157	L265P	2j1y	0.50008	destabilizing
7157	L265P	4ibq	1.06781	destabilizing
7157	L265P	4ibs	0.93006	destabilizing
7157	L265P	4ibt	1.07571	destabilizing
7157	L265P	4ibz	0.98577	destabilizing
7157	L265Q	2j1y	0.94242	destabilizing
7157	L265Q	4ibq	0.63366	destabilizing
7157	L265Q	4ibs	1.18093	destabilizing
7157	L265Q	4ibt	0.90339	destabilizing
7157	L265Q	4ibz	0.69803	destabilizing
7157	L265R	2j1y	2.27705	destabilizing
7157	L265R	4ibq	2.18572	destabilizing
7157	L265R	4ibs	1.51851	destabilizing
7157	L265R	4ibt	0.95669	destabilizing
7157	L265R	4ibz	1.32571	destabilizing
7157	L265T	4ibq	1.06369	destabilizing
7157	L265T	4ibs	1.15257	destabilizing
7157	L265T	4ibt	1.2114	destabilizing
7157	L265T	4ibz	1.24304	destabilizing
7157	L330H	1a1u	1.8065	destabilizing
7157	L330H	1hs5	3.6779	destabilizing
7157	L330H	1pes	2.7976	destabilizing
7157	L330H	1pet	7.2552	destabilizing
7157	L330H	2j0z	1.161	destabilizing
7157	L330H	2j10	2.9477	destabilizing
7157	L330H	2j11	1.6042	destabilizing
7157	L330H	3q01	5.9658	destabilizing
7157	L330P	1a1u	4.78051	destabilizing
7157	L330P	1hs5	3.4154	destabilizing
7157	L330P	1pes	3.2808	destabilizing
7157	L330P	1pet	4.6543	destabilizing
7157	L330P	2j0z	4.8551	destabilizing
7157	L330P	2j10	3.3628	destabilizing
7157	L330P	2j11	1.9502	destabilizing
7157	L330P	3q01	6.0165	destabilizing
7157	L330R	1a1u	0.7956	destabilizing
7157	L330R	1hs5	2.9403	destabilizing
7157	L330R	1pes	3.4375	destabilizing
7157	L330R	1pet	3.3177	destabilizing
7157	L330R	2j0z	1.1807	destabilizing
7157	L330R	2j10	1.0362	destabilizing
7157	L330R	2j11	2.6103	destabilizing
7157	L330R	3q01	3.198	destabilizing
7157	L344P	1olg	0.74332	destabilizing
7157	L344P	1olg	0.5552	destabilizing
7157	L344P	1olg	0.63393	destabilizing
7157	L344P	1olh	0.70886	destabilizing
7157	L344P	1olh	0.5647	destabilizing
7157	L344P	1olh	0.54009	destabilizing
7157	L344P	1pes	1.24493	destabilizing
7157	L344P	1pet	0.6217	destabilizing
7157	L344P	1pet	2.13386	destabilizing
7157	L344P	1pet	1.03516	destabilizing
7157	L344P	1saf	1.10222	destabilizing
7157	L344P	1saf	0.5356	destabilizing
7157	L344P	1saf	0.729583	destabilizing
7157	L344P	1sal	1.11629	destabilizing
7157	L344P	1sal	1.18752	destabilizing
7157	L344P	2j0z	0.9453	destabilizing
7157	L344P	2j0z	1.23011	destabilizing
7157	L344P	2j10	1.0257	destabilizing
7157	L344P	2j10	1.34445	destabilizing
7157	L344P	2j11	0.9488	destabilizing
7157	L344P	2j11	0.94217	destabilizing
7157	L344P	3sak	1.16032	destabilizing
7157	L344P	3sak	0.985446	destabilizing
7157	L344R	1olg	0.62459	destabilizing
7157	L344R	1olg	0.6434	destabilizing
7157	L344R	1olg	0.93363	destabilizing
7157	L344R	1olh	1.00729	destabilizing
7157	L344R	1olh	0.601	destabilizing
7157	L344R	1olh	0.73422	destabilizing
7157	L344R	1pes	4.74537	destabilizing
7157	L344R	1pes	1.22551	destabilizing
7157	L344R	1pet	1.4407	destabilizing
7157	L344R	1pet	4.48394	destabilizing
7157	L344R	1pet	2.50827	destabilizing
7157	L344R	1saf	0.8723	destabilizing
7157	L344R	1saf	0.5819	destabilizing
7157	L344R	1saf	1.12687	destabilizing
7157	L344R	1sal	0.68139	destabilizing
7157	L344R	1sal	0.5691	destabilizing
7157	L344R	1sal	0.966586	destabilizing
7157	L344R	2j0z	0.5754	destabilizing
7157	L344R	2j0z	1.60755	destabilizing
7157	L344R	2j10	1.5792	destabilizing
7157	L344R	2j10	1.4266	destabilizing
7157	L344R	2j11	0.6028	destabilizing
7157	L344R	2j11	0.718203	destabilizing
7157	L344R	2j11	0.80625	destabilizing
7157	L344R	3sak	1.02317	destabilizing
7157	L344R	3sak	1.13965	destabilizing
7157	L348F	1a1u	0.7194	destabilizing
7157	L348F	1hs5	6.0917	destabilizing
7157	L348F	1pet	-0.77641	stabilizing
7157	L348F	1sae	-0.82855	stabilizing
7157	L348F	1saf	0.68368	destabilizing
7157	L348F	1saf	0.5995	destabilizing
7157	L348F	1sak	-0.61441	stabilizing
7157	L348F	1sak	0.6174	destabilizing
7157	L348F	1sal	-0.69815	stabilizing
7157	L348F	2j11	-0.74872	stabilizing
7157	L348F	3sak	-0.94616	stabilizing
7157	L348F	3sak	0.8101	destabilizing
7157	L383F	1h26	3.69651	destabilizing
7157	L383F	1jsp	1.0215	destabilizing
7157	L45P	2ly4	1.3197	destabilizing
7157	L93M	2xwr	-0.64831	stabilizing
7157	M169I	4agn	0.618997	destabilizing
7157	M169T	4agn	0.89865	destabilizing
7157	M169V	4agn	1.04711	destabilizing
7157	M243I	1gzh	0.53796	destabilizing
7157	M243I	2ady	0.64928	destabilizing
7157	M243I	2ahi	0.56488	destabilizing
7157	M243I	2ata	0.59535	destabilizing
7157	M243I	3q06	0.5723	destabilizing
7157	M243K	1gzh	1.01422	destabilizing
7157	M243K	1kzy	1.7745	destabilizing
7157	M243K	1ycs	0.5083	destabilizing
7157	M243K	2ac0	1.06718	destabilizing
7157	M243K	2ahi	2.1058	destabilizing
7157	M243K	2ata	1.18167	destabilizing
7157	M243K	2ybg	1.18228	destabilizing
7157	M243K	3kmd	1.06806	destabilizing
7157	M243K	3q05	0.92686	destabilizing
7157	M243K	3q06	2.03326	destabilizing
7157	M243K	3ts8	1.91772	destabilizing
7157	M243K	4hje	0.569506	destabilizing
7157	M243K	4ibu	0.90323	destabilizing
7157	M243K	4iby	1.55643	destabilizing
7157	M243L	1kzy	0.59444	destabilizing
7157	M243L	2ac0	0.69643	destabilizing
7157	M243L	2ahi	1.4052	destabilizing
7157	M243L	2ata	1.19974	destabilizing
7157	M243L	4ibu	-0.50618	stabilizing
7157	M243L	4iby	0.50562	destabilizing
7157	M243R	1gzh	0.70114	destabilizing
7157	M243R	2ac0	1.42931	destabilizing
7157	M243R	2ady	1.40994	destabilizing
7157	M243R	2ahi	2.17093	destabilizing
7157	M243R	2ata	1.30436	destabilizing
7157	M243R	2ybg	1.42221	destabilizing
7157	M243R	3kmd	1.40352	destabilizing
7157	M243R	3q05	0.59935	destabilizing
7157	M243R	3q06	1.62867	destabilizing
7157	M243R	3ts8	1.68206	destabilizing
7157	M243R	4hje	0.843197	destabilizing
7157	M243R	4ibu	0.84807	destabilizing
7157	M243R	4iby	1.88713	destabilizing
7157	M243T	1gzh	1.76183	destabilizing
7157	M243T	1kzy	1.91013	destabilizing
7157	M243T	1ycs	1.90855	destabilizing
7157	M243T	2ac0	1.7363	destabilizing
7157	M243T	2ady	1.45359	destabilizing
7157	M243T	2ahi	2.15391	destabilizing
7157	M243T	2ata	1.95295	destabilizing
7157	M243T	2ybg	2.34735	destabilizing
7157	M243T	3kmd	1.13866	destabilizing
7157	M243T	3q05	1.20292	destabilizing
7157	M243T	3q06	1.96534	destabilizing
7157	M243T	3ts8	1.76903	destabilizing
7157	M243T	4hje	0.679786	destabilizing
7157	M243T	4ibu	0.99559	destabilizing
7157	M243T	4iby	2.21002	destabilizing
7157	M243V	1gzh	1.24348	destabilizing
7157	M243V	1kzy	1.04488	destabilizing
7157	M243V	1ycs	0.9455	destabilizing
7157	M243V	2ac0	1.15846	destabilizing
7157	M243V	2ady	1.16469	destabilizing
7157	M243V	2ahi	1.22536	destabilizing
7157	M243V	2ata	1.67861	destabilizing
7157	M243V	2ybg	1.83955	destabilizing
7157	M243V	3kmd	0.766024	destabilizing
7157	M243V	3q06	1.55552	destabilizing
7157	M243V	3ts8	1.02113	destabilizing
7157	M243V	4hje	0.626593	destabilizing
7157	M243V	4iby	1.12136	destabilizing
7157	M40K	2ly4	0.7669	destabilizing
7157	M40R	2ly4	0.8741	destabilizing
7157	M44I	2b3g	0.555	destabilizing
7157	M44I	2ly4	3.7062	destabilizing
7157	M44T	2b3g	2.4382	destabilizing
7157	M44T	2ly4	2.0449	destabilizing
7157	M44V	2b3g	1.4861	destabilizing
7157	M44V	2ly4	2.87514	destabilizing
7157	N210D	1tup	-0.60444	stabilizing
7157	N210H	1tup	-1.19958	stabilizing
7157	N210I	1tsr	-0.68395	stabilizing
7157	N210I	1tup	-1.05087	stabilizing
7157	N210K	1tup	-0.52238	stabilizing
7157	N210S	1tup	-0.77181	stabilizing
7157	N210T	1tup	-0.7969	stabilizing
7157	N239K	2ybg	-0.55881	stabilizing
7157	N247D	1gzh	1.83668	destabilizing
7157	N247D	1kzy	0.94933	destabilizing
7157	N247D	1ycs	3.57112	destabilizing
7157	N247F	1gzh	2.20303	destabilizing
7157	N247F	1kzy	1.74315	destabilizing
7157	N247F	1ycs	8.35114	destabilizing
7157	N247F	4iby	-1.51465	stabilizing
7157	N247I	1kzy	2.07822	destabilizing
7157	N247K	1ycs	1.4104	destabilizing
7157	N247S	1gzh	-0.76971	stabilizing
7157	N247S	1ycs	0.8498	destabilizing
7157	N247T	1gzh	-1.22251	stabilizing
7157	N247T	1kzy	-0.70936	stabilizing
7157	N247Y	1gzh	4.35986	destabilizing
7157	N247Y	1kzy	3.93701	destabilizing
7157	N247Y	1ycs	19.6693	destabilizing
7157	N247Y	4iby	-1.05114	stabilizing
7157	N263D	2j1y	0.57264	destabilizing
7157	N263D	4ibs	0.70825	destabilizing
7157	N263D	4ibt	0.99937	destabilizing
7157	N263H	4ibq	-1.7819	stabilizing
7157	N263H	4ibs	-1.87555	stabilizing
7157	N263H	4ibt	-0.98898	stabilizing
7157	N263H	4ibz	-0.86691	stabilizing
7157	N263I	2j1y	-2.11276	stabilizing
7157	N263I	4ibq	-1.74308	stabilizing
7157	N263I	4ibs	-2.07309	stabilizing
7157	N263I	4ibt	-2.05708	stabilizing
7157	N263I	4ibz	-2.08945	stabilizing
7157	N263K	4ibq	-0.81762	stabilizing
7157	N263K	4ibs	-1.28865	stabilizing
7157	N263K	4ibt	-1.09098	stabilizing
7157	N263K	4ibz	-1.44724	stabilizing
7157	N30K	2k8f	-1.61264	stabilizing
7157	N345D	3q01	1.4061	destabilizing
[truncated: 905 more rows]
